# Supplementary material for: The overlooked conservation value and ecosystem services of saline lakes
Source: Research Square preprint supplement (doi:10.21203/rs.3.rs-5835171/v1), 2025-02-24
Supplement: Supplementary file 2 [file 7f649e399aa2313579b71052.xlsx]

## Sheet: no_of_services
Lake	Ramsar	Nationally_protected	End_species	Lake_water	Catchment_Water	waste_water_discharge	Populated	Fishery	biomass_harvest	salts_extraction	Recreation	Science	Other_cultural_services	Lat	Long
Queimadas	0	0	0	1,00	1	0	1	0	0	0	1	1	1	-6.94	-35.79
Aydar-Arnasay lake system (AALS)	1,00	1,00	1,00	1	1,00	1,00	1,00	1,00	1,00	0,00	1,00	1,00	0,00	40.92	66.8
Lake Bain-Tsagan	0	0	1	1	0	0	0	1	0	0	0	1	0	50.33	115.1
Balkhash	1	1	1	1	1	1	1	1	1	0	1	1	1	46.62	75.69
Lake Koyashskoye	0	1	1	0	0	0	0	0	0	0	1	1	1	45.05	36.19
Lake Marfovskoye	0	0	0	0	1	1	1	0	0	0	1	1	1	45.2	36.11
Lake Sakskoye	0	0	0	0	1	1	1	0	0	1	1	1	1	45.12	33.57
Lake Sasyk-Sivash	0,00	1,00	1,00	0,00	1,00	1,00	1,00	0,00	0,00	1,00	1,00	1,00	1,00	45.19	33.51
The Dead Sea	0,00	1,00	0,00	1,00	1,00	1,00	1,00	0,00	0,00	1,00	1,00	1,00	1,00	31.56	35.48
Lake Doroninskoe	0,00	1,00	0,00	0,00	0,00	0,00	0,00	0,00	0,00	0,00	1,00	1,00	1,00	51.24	112.23
Fuente de Piedra Lake	1,00	1,00	1,00	1,00	1,00	1	1	0	0	0	1	1	1	37.1	-4.75
Gallocanta Lake	1,00	1,00	1,00	0,00	0,00	0,00	1,00	0,00	0,00	0,00	1,00	1,00	1,00	40.98	-1.5
Gidgee Lake	0,00	0,00	1,00	1,00	0,00	0,00	0,00	0,00	0,00	0,00	0,00	0,00	0,00	-29.55	144.83
Kamfers Dam	0,00	0,00	1,00	0,00	1,00	1,00	0,00	0,00	1,00	0,00	1,00	1,00	1,00	-28.67	24.76
Kanibarazan Wetland	1,00	1,00	1,00	1,00	1,00	1,00	1,00	0,00	0,00	0,00	1,00	1,00	1,00	36.98	45.77
Kelemen-sz‚k	1,00	1,00	1,00	0,00	0,00	0,00	0,00	0,00	0,00	0,00	1,00	1,00	1,00	46.8	19.18
Lake Khukh	1,00	1,00	1,00	1,00	1,00	0,00	0,00	1,00	0,00	0,00	0,00	1,00	0,00	49.52	115.58
Laguna de Alcahozo	0,00	1,00	1,00	0,00	1,00	0,00	0,00	0,00	0,00	0,00	0,00	1,00	1,00	39.39	-2.88
Laguna de Manjavacas	1,00	1,00	1,00	0,00	1,00	1,00	0,00	0,00	0,00	0,00	1,00	1,00	1,00	39.42	-2.86
Laguna de los Tollos	0,00	1,00	1,00	0,00	1,00	0,00	0,00	0,00	0,00	0,00	1,00	1,00	1,00	36.84	-6.02
Lake Abijata	1,00	1,00	1,00	1,00	1,00	1,00	1,00	0,00	0,00	1,00	1,00	1,00	1,00	7.62	38.6
Lake Baskunchak	0,00	1,00	1,00	1,00	1,00	0,00	1,00	0,00	0,00	1,00	1,00	1,00	1,00	48.2	46.89
Lake Bogoria	1,00	1,00	1,00	0,00	1,00	1,00	0,00	0,00	1,00	0,00	1,00	1,00	1,00	0.25	36.1
Lake Carey	0,00	0,00	1,00	0,00	0,00	1,00	0,00	0,00	0,00	1	1,00	0,00	1,00	-29.12	122.34
Salada de Chiprana	1,00	1,00	1,00	0,00	0,00	1,00	0,00	0,00	0,00	0,00	1,00	1,00	1,00	41.24	-0.18
Lake Corangamite	1,00	1,00	1,00	0,00	1,00	0,00	1,00	0,00	0,00	0,00	1,00	1,00	1,00	-38.18	143.4
Laguna Diamante	1,00	1,00	1,00	0,00	0,00	0,00	0,00	0,00	0,00	0,00	1,00	1,00	1,00	-26.02	-67.03
Lake Dunino	0,00	0,00	0,00	1,00	0,00	0,00	1,00	0,00	0,00	0,00	1,00	1,00	1,00	51.15	55.01
Lake Elementeita	1	0	1	0	1	0	1	0	0	1	1	1	1	-0.44	36.24
Lake Elton	0	1	1	1	1	0	0	0	0	1	1	1	1	49.15	46.68
Lake Eyre	0	1	0	0	1	0	0	0	0	0	1	1	1	-28.42	137.28
Lake Gairdner	0	1	0	0	1	0	0	0	0	1	1	1	1	-31.66	136.02
Lake George	0	1	1	0	1	0	0	0	1	1	1	1	1	-35.17	149.42
Laguna Grande	1	1	1	0	0	0	0	0	0	0	1	1	1	-26.23	-67.05
Lake Katwe	0	0	1	0	1	0	1	0	0	1	1	1	1	-0.13	29.87
Lake Kikorongo	0	1	1	0	0	0	0	0	0	0	1	1	0	-0.02	30.02
Lake Kisezers	0	1	1	0	0	0	1	1	0	0	1	0	1	57.02	24.18
Lake Krasnovishnevoye	0	0	1	0	0	0	0	0	0	0	0	0	0	53.84	76.94
Lake Liepaja	0	1	1	0	0	0	1	1	0	0	1	0	1	56.47	21.67
Lake Malinovoe	0	0	1	0	0	0	1	0	0	0	1	0	1	51.69	79.74
Lake Neusiedl	1	1	1	1	0	1	1	1	1	0	1	1	1	47.82	16.75
Lake Nozhiy	0	1	0	1	0	0	0	1	0	0	1	0	1	50.82	114.8
Lake Oloidien	1	0	1	1	1	1	1	1	1	0	1	1	1	-0.81	36.28
Lake Pape	1	1	1	0	0	0	1	1	1	0	1	1	1	56.19	21.06
Lake Razval	0	0	0	1	0	0	1	0	0	0	1	1	1	51.15	55
Lake Sarpa	1	1	1	1	0	1	0	1	0	0	0	1	1	47.36	45.2
Lake Shala	1	1	1	1	1	1	1	0	0	0	1	1	1	7.48	38.51
Lake Shira	0	1	1	0	1	1	1	0	1	0	1	1	0	54.51	90.2
Lake Titicaca	1	1	1	1	1	1	1	1	1	0	1	1	1	-15.83	-69.35
Lake Urmia	1	1	1	0	1	1	1	0	1	1	1	1	1	37.5	45.5
Lake Wyara	1	1	0	0	0	0	0	0	0	0	1	0	1	-28.7	144.24
Lake Torrens	0	1	0	0	1	0	0	0	0	1	1	1	1	-31.02	137.85
Lake Mar Chiquita	1	1	1	0	1	1	1	0	1	1	1	1	1	-30.5	-62.67
Mar Menor	1	1	1	0	1	1	1	1	0	1	1	1	1	37.72	-0.77
Mono Lake	0	1	0	0	1	0	0	0	1	0	1	1	1	38.02	-119.01
Lake Nakuru	1	1	1	0	1	1	1	0	0	0	1	1	1	-0.37	36.08
Playa Lake	1	0	1	0	0	0	0	0	0	0	1	1	1	41.67	-0.17
The Sambhar Salt Lake	1	1	1	1	1	1	1	0	1	1	1	1	1	26.94	75.09
Seagull Lake	0	1	1	1	1	0	0	0	0	0	1	0	1	-32.96	134.22
S¢skop¢ or Slano Kopovo	1	1	1	0	0	0	0	0	0	0	1	1	1	45.63	20.21
Soda pans in the Seewinkel district	1	1	1	0	1	0	1	1	0	0	1	1	1	47.79	16.85
Lake Barun-Torey (Torey lakes)	1	1	1	1	1	0	0	0	0	0	0	1	1	50.07	115.54
Lake Zun-Torey (Torey lakes)	1	1	1	1	1	0	0	0	0	0	1	1	1	50.08	115.81
Wyoming Saline Playas	0	0	0	0	0	0	0	0	1	0	1	0	0	41.16	-105.71
Lake Albert	0	1	1	0	1	1	0	0	1	0	0	1	1	42.65	-120.22
Great Salt lake	0	0	0	1	1	1	1	0	1	1	1	1	1	41.2	-112.8
Lake Pontchartrain	0	0	1	1	0	1	1	1	0	0	1	1	1	30.17	-90.19
Larnaca Lake	1	1	1	0	0	0	1	0	0	0	1	1	1	34.9	33.62
Limassol salt lake	1	1	1	0	0	0	1	0	0	0	1	1	1	34.62	32.97
Lake Acigol	1	0	1	1	1	1	0	0	0	1	0	1	0	37.82	29.88
Laguna Epecuen	0	1	0	1	1	1	1	0	0	1	1	1	1	-37.13	-62.88
La Salada (Pedro Luro)	0	1	0	1	1	0	1	0	0	0	1	1	1	-39.46	-62.7
La Alberca	0	1	1	1	1	0	0	0	0	0	1	1	1	20.39	-101.2
Lake Cuitzeo	0	1	1	1	1	1	1	1	1	0	1	1	1	19.92	-101.1
Lake Alchichica	0	1	1	0	1	1	1	0	0	0	1	1	1	19.41	-97.4
Texcoco	1	1	1	1	1	1	1	1	1	1	0	1	1	19.42	-99.13
Rincon de Parangueo	0	1	0	1	1	0	0	0	0	0	1	1	1	20.43	-101.25
Salton Sea	0	1	0	0	0	1	1	0	0	0	1	1	0	33.31	-115.83
Laguna Chadilauquen	0	0	1	0	0	0	0	0	0	0	1	1	1	-35.4	-64.32
Laguna El Carancho	0	0	1	0	0	0	0	0	0	0	0	1	1	-37.45	-65.05
Laguna Este Parque Luro	0	1	1	0	0	0	0	0	0	0	0	1	0	-36.92	-64.18
Laguna Utracan	0	1	1	0	0	0	0	0	0	0	1	1	1	-37.28	-64.6
Qarhan Salt Lake	0	1	1	1	1	1	0	0	1	1	1	1	1	37	95.1
Qinghai Lake	1	1	1	1	1	1	1	0	1	1	1	1	1	36.8	100.1

## Sheet: Lakes_categories_analysis
Remoteness	Lake name	Lake Size, km2	Volume, m3	Surface area: volume	Maximal depth, m	Average depth, m	Salinity (average), g/l	Salinity variation coefficient	ephemeral	Fish presence	Protected area (national or regional) status or Ramsar	Presence of endangered species according to national or international law (e.g. IUCN red list)	Presence of Endemic Species	Lake water is used for economic purposes	Water from the closed basin is withdrawn for economic purposes	Lake or associated wetland is used for the discharge of waste water	Lake shore is populated,	Lake is used for commercial fishery	Lake or associated wetlands are used to harvest other biological resources	Lakes is used for commercial extraction of salts, minerals or muds	Lakes is used as recreational site	Lake is used as valuable science research object	There are at least 20 papers in Web of Science Core Collection searched with ?Lake Name?	The lake is used for teaching course and/or There is a research field station at the lake	Lake provides cultural ecosystem services	Does lake experience water withdrawal	The climate change is expected to have a severe impact on the lake?s provision of ecosystem services	There are invasive or introduced species in the lake	continentalsaline	continentalsoda	seawater	totalservice
167.726	Lake Elton	152	24000000	6.33e-06	1.5	0.125	375	1.09867	0	0	1	1	1	1	1	0	0	0	0	1	1	1	1	1	1	1	1	0	1	0	0	7
34.0054	The Dead Sea	600	118000000000	5.08e-09	294	195	350	0.314286	1	0	1	0	0	1	1	1	1	0	0	1	1	1	1	1	1	1	0	0	1	0	0	6
185.767	Lake Baskunchak	106	157500000	6.73e-07	3	0.75	335	0.208955	0	0	1	1	1	1	1	0	1	0	0	1	1	1	0	1	1	1	1	0	0	0	1	6
226	Lake Marfovskoye	2.394	718200	3.33e-06	0.6	0.3	320	1.10938	1	0	0	0	0	0	1	1	1	0	0	0	1	1	0	1	1	1	0	0	1	0	0	5
262.162	Lake Krasnovishnevoye	20	3000000	6.67e-06	0.5	0.15	300	0.0666667	0	0	0	1	0	0	0	0	0	0	0	0	0	0	0	0	0	0	0	0	1	0	0	0
68.9121	Lake Razval	0.068	350000	1.94e-07	22	15	300	0.642	1	0	0	0	0	1	0	0	1	0	0	0	1	1	0	0	1	0	1	0	0	0	1	5
257.946	Lake Sasyk-Sivash	75.3	37650000	2e-06	1.2	0.5	275	0.0545455	0	0	1	1		0	1	1	1	0	0	1	1	1	0	1	1	0	0	0	0	0	1	5
35.7113	Lake Urmia	2821.5	3410000000	8.27e-07	3.5	1.5	275	0.909091	1	0	1	1	1	0	1	1	1	0	1	1	1	1	1	1	1	1	1	0	1	0	0	6
330.511	Lake Malinovoe	11	5500000	2e-06	1	0.5	250	1.24	0	0	0	1	0	0	0	0	1	0	0	0	1	0	0	0	1	0	0	0	1	0	0	0
219.675	Lake Koyashskoye	5.1	2500000	2.04e-06	1	0.4	240	0.375	0	0	1	1	0	0	0	0	0	0	0	0	1	1	1	1	1	0	0	0	0	0	1	3
434.764	Lake Gairdner	4300	860000000	5e-06	0.5	0.2	210		1	0	1	0	1	0	1	0	0	0	0	1	1	1	0	0	1	0	1	0	0	0	1	4
201.603	Laguna Diamante	19	3800000	5e-06	0.9	0.2	171.9	1.1402	0	0	1	1	1	0	0	0	0	0	0	0	1	1	0	0	1	1	1	0	0	0	1	3
68.7834	Lake Dunino	0.089	180000	4.94e-07	13	6	167.3	1.71907	0	0	0	0	0	1	0	0	1	0	0	0	1	1	0	0	1	0	1	0	0	0	1	4
142.491	Lake Corangamite	13.96	1509000000	9.25e-09	1	0.9	165	0.69697	0	0	1	1	0	0	1	0	1	0	0	0	1	1	0	1	1	0	1	0	0	0	1	3
266.137	Lake Sakskoye	9.7	5800000	1.67e-06	1.52	0.6	160	0.15625	0	0	0	0	0	0	1	1	1	0	0	1	1	1	0	1	1	0	0	0	0	0	1	6
872.796	Lake Wyara	34	68000000	5e-07	6	2	160	2.05625	1	1	1	0	0	0	0	0	0	0	0	0	1	0	0	0	1	0	1	1	1	0	0	2
186.16	Lake Katwe	2.5	2500000	1e-06	2.1	1	150	0.433333	0	0	0	1		0	1	0	1	0	0	1	1	1	0	0	1	1	1		0	1	0	4
458.615	Seagull Lake	0.6065	337000	1.8e-06	0.9	0.325	137.5	0.909091	1	1	1	1		1	1	0	0	0	0	0	1	0	0	0	1	0	1	0	0	0	1	3
695.961	Lake Carey	750	375000000	2e-06		0.5	123.6	1.88511	1	0	0	1	1	0	0	1	0	0	0		1	0	0	0	1	0	0	0	0	0	1	4
734.891	Lake Eyre	9690	30100000000	3.22e-07	5.7	2.5	96	2.57292	1	1	1	0	0	0	1	0	0	0	0	0	1	1	1	0	1	0	1	0	0	0	1	4
770.586	Gidgee Lake	2.2	2000000	1.1e-06	2	0.3	90	1.96667	1	0	0	1	0	1	0	0	0	0	0	0	0	0	0	0	0	0	1	0	0	0	1	0
440.848	Lake Torrens	5923	3000000000	1.97e-06	1.3	0.6	90	2.62778	1	1	1	0	1	0	1	0	0	0	0	1	1	1	0	0	1	0	1	0	1	0	0	4
59.5618	Playa Lake	2.4	240000000	1e-08	0.5	0.01	87.5	1.6	1	0	1	1	1	0	0	0	0	0	0	0	1	1	1	1	1	0	1	0	1	0	0	3
158.215	Lake Sarpa	1.7	850000	2e-06	0.5	0.5	85	1.12941	0	1	1	1	1	1	0	1	0	1	0	0	0	1	0	1	1	0	1	0	1	0	0	6
151.777	Mono Lake	160	2720000000	5.88e-08	45	17	80	0.625	0	0	1	0		0	1	0	0	0	1	0	1	1	1	1	1	1	1	0	0	1	0	5
68.6546	The Sambhar Salt Lake	190	227000000000	8.36e-10	3	0.6	74	7.45946	1	0	1	1	1	1	1	1	1	0	1	1	1	1	1	0	1	1	1	0	1	0	0	8
74.0459	Salada de Chiprana	1.55	405000	3.83e-06	5.6	2.3	63	0.952381	0	1	1	1	1	0	0	1	0	0	0	0	1	1	0	1	1	0	1	0	1	0	0	4
133.785	Laguna de Alcahozo	0.77	220000	3.5e-06	0.3	0.11	60.79	1.42902	1	0	1	1	1	0	1	0	0	0	0	0	0	1	0	1	1	1	1	0	1	0	0	3
90.2681	Gallocanta Lake	14.4	5760000	2.5e-06	2	0.4	60	1.83333	1	0	1	1	0	0	0	0	1	0	0	0	1	1	1	1	1	0	1	0	0	0	1	3
163.638	Kamfers Dam	4	1900000	2.11e-06	1	0.5	60	2.5	1	0	0	1	0	0	1	1	0	0	1	0	1	1	0	0	1	0	1	0	1	0	0	6
131.966	Laguna de Manjavacas	2.59	1060000	2.44e-06	0.6	0.22	50.33	1.576	1	0	1	1	1	0	1	1	0	0	0	0	1	1	1	1	1	1	1	0	1	0	0	5
176.931	Lake Mar Chiquita	3250	13000000000	2.5e-07	12	4	50	4.84	0	0	1	1		0	1	1	1	0	1	1	1	1	1	1	1	1	1	1	1	0	0	7
169.448	Wyoming Saline Playas	4	32500	0.000123077	0.5	0.25	50	1.2	1	0	0	0	1	0	0	0	0	0	1	0	1	0	0	0	0	0		0	1	0	0	1
197.885	Mar Menor	140	580000000	2.41e-07	7	4	44.5	0.382022	0	1	1	1	1	0	1	1	1	1	0	1	1	1	1	1	1	1	1	1	0	0	1	8
51.9174	Fuente de Piedra Lake	13.64	5000000	2.728e-06	1.5	0.5	41.2	9.46602	1	0	1	1	0	1	1	1	1	0	0	0	1	1	1	1	1	1	1	1	1	0	0	6
59.9481	Laguna de los Tollos	1.1	680000	1.62e-06	1.5	0.35	39.9	0.822556	0	0	1	1	1	0	1	0	0	0	0	0	1	1	0	1	1	1	1	0	1	0	0	4
531.534	Lake Doroninskoe	4.5	15000000	3e-07	6.5	3	28	3	0	0	1	0	0	0	0	0	0	0	0	0	1	1	0	0	1	0	1	1	0	1	0	3
62	Lake Bogoria	38	247000000	1.54e-07	11	6.5	27	0.962963	0	0	1	1	0	0	1	1	0	0	1	0	1	1	1	1	1	1	1	0	0	1	0	6
178.895	Lake Abijata	150	3800000000	3.95e-08	14	7.6	26.4	0.4875	1	0	1	1	0	1	1	1	1	0	0	1	1	1	1	1	1	1	1	0	0	1	0	7
204.86	Lake Kikorongo	0.96	2208000	4.35e-07	11	2.3	23.15	1	1	1	1	1		0	0	0	0	0	0	0	1	1	0	1	0	0	1		0	1	0	2
218.565	Lake George	154	500000000	3.08e-07	7.5	1	19	1.78947	1	1	1	1	0	0	1	0	0	0	1	1	1	1		1	1	0	1	1	0	0	1	6
174.244	Lake Shala	329	37000000000	8.89e-09	266	87	18.6		1	1	1	1	0	1	1	1	1	0	0	0	1	1		1	1	1			0	1	0	5
218.227	Lake Shira	36	385000000	9.35e-08	24	11	16	0.75	0	0	1	1	0	0	1	1	1	0	1	0	1	1	1	1	0	0	1	0	1	0	0	5
23.38	Lake Elementeita	20	65000000	3.08e-07	4	3.25	11	3.13636	1	0	1	1	0	0	1	0	1	0	0	1	1	1		0	1	1	1	0	0	1	0	5
193.588	Laguna Grande	3.12	187200	1.67e-05	0.1	0.06	9.8	0.979592	0	0	1	1	1	0	0	0	0	0	0	0	1	1	0	0	1	0	1	0	0	0	1	3
78.3911	Kelemen-sz‚k	1.9	304000	6.25e-06	1	0.16	7.25		1	0	1	1	1	0	0	0	0	0	0	0	1	1	1	1	1	0	1	1	0	1	0	3
442.634	Lake Khukh	51.6	304000000	1.7e-07	10.2	3.5	6.86	0.728863	0	1	1	1		1	1	0	0	1	0	0	0	1	0	0	0	0	1	0	0	1	0	4
7.08	Lake Nakuru	60	180000000	3.33e-07	5.7	3	5.3	11.6038	1	1	1	1	0	0	1	1	1	0	0	0	1	1	1	1	1	1	1	1	0	1	0	5
425.124	Lake Zun-Torey (Torey lakes)	193.03	600000000	3.22e-07	6.5	2	5	3.4	0	1	1	1	0	1	1	0	0	0	0	0	1	1	0	1	1	0	1	1	0	1	0	5
141.027	Aydar-Arnasay lake system (AALS)	3478	38500000000	9.03e-08	31	8	4.75	2.73684	0	1	1	1	1	1	1	1	1	1	1	0	1	1	0	1	0	1	1	1	1	0	0	7
477.621	Lake Bain-Tsagan	4	23000000	1.74e-07	7.1	5	4	5.75	0	1	0	1	0	1	0	0	0	1	0	0	0	1	1	0	0	0	0	1	0	1	0	2
386.548	Balkhash	20300	125000000000	1.63e-07	27	5.8	4	1.275	1	1	1	1	1	1	1	1	1	1	1	0	1	1		1	1	1	1	1	1	0	0	8
58.6606	Soda pans in the Seewinkel district	4.7	980000	4.8e-06	1	0.21	3.7	7.02703	1	1	1	1	1	0	1	0	1	1	0	0	1	1	1	1	1	0	1	1	1	0	0	5
444.678	Lake Barun-Torey (Torey lakes)	1.5	100000000	1.5e-08	4	1.8	3	1.66667	1	1	1	1	0	1	1	0	0	0	0	0	0	1	0	0	1	0	0	1	0	1	0	2
92.3442	S¢skop¢ or Slano Kopovo	1.19	238000	5e-06	0.7	0.2	2.6		1	0	1	1	1	0	0	0	0	0	0	0	1	1	1	0	1	0	1	1	0	1	0	3
60.79	Lake Oloidien	4.5	12600000	3.57e-07	9	7.5	2.5	2	0	1	1	1	0	1	1	1	1	1	1	0	1	1	0	1	1	1	1	1	0	1	0	7
106.828	Queimadas	0.2	190600	1.05e-06	3	2.5	1.8	1.11111	1	1	0	0	0	1	1	0	1	0	0	0	1	1	0	1	1	1	1	1	1	0	0	4
86.3091	Kanibarazan Wetland	9.27	14000000	6.62e-07	1.5	0.8	1.5	5.33333	0	1	1	1	1	1	1	1	1	0	0	0	1	1	0	0	1	1	0	1	0	0	1	6
158.247	Lake Liepaja	37.15	74300000	5e-07	2.8	2	1.3	5.61538	0	1	1	1	0	0	0	0	1	1	0	0	1	0	0		1	0	1	1	1	0	0	3
51.7887	Lake Neusiedl	180	241200000	7.46e-07	1.8	1.2	1.3	1.4	0	1	1	1	1	1	0	1	1	1	1	0	1	1	1	1	1	0	1	1	1	0	0	6
506.959	Lake Nozhiy	15	37500000	4e-07	55	2.5	1.3	3.46154	1	1	1	0		1	0	0	0	1	0	0	1	0	0	1	1	0	1	1	0	1	0	4
8.98014	Lake Kisezers	17.3	41700000	4.15e-07	4.5	2.4	1	7.8	0	1	1	1	0	0	0	0	1	1	0	0	1	0	0	0	1	0	1	1	1	0	0	4
204.757	Lake Pape	12.05	6020000	2e-06	1.1	0.5	1	4.8	0	1	1	1	0	0	0	0	1	1	1	0	1	1	0	1	1	0	1	1	0	1	0	4
144.068	Lake Titicaca	8100	850000000000	9.53e-09	281	100	0.7	0.714286	0	1	1	1	1	1	1	1	1	1	1	0	1	1	1	0	1	1	1	1	0	1	1	8
279.16	Lake Albert	170	6000000000	2.83e-08	5	1.5	100	2.5	1	0	1	1	0																0	1	0
5	Great Salt lake	4137	18500000000	2.24e-07	10	4.5	218	1.05505	0	0	0	0	0																1	0	0
0.1	Lake Pontchartrain	1630	6000000000	2.72e-07	20	4	3.5	1	0	1	0	1	0																1	0	0
0.1	Larnaca Lake	4.49	1077600	4.17e-06	1.5	0.24	200	1.275	1	0	1	1	1																1	0	0
2	Limassol salt lake	9.4	2538000	3.7e-06	1	0.3	65	1.46154	1	1	1	1	1																1	0	0
64.12	Lake Acigol	45	99054	0.000454	2	1.2	45	0.333333	0	1	1	1	1																1	0	0
488.43	Laguna Epecuen	151.06	328000000	4.61e-07		8.2	170		0	0	1	1	0																1	0	0
659.16	La Salada (Pedro Luro)	4	11.7	0.342	6	2.5	30.4	1.01974	0	1	1	1	0																1	0	0
75.6	La Alberca	0.181	9050000	2e-08			5	4.6	1	1	1	1	1																0	1	0
20.79	Lake Cuitzeo	306	920000000	3.33e-07	2	1	5.6	2.32143	0	1	1	1	1																0	1	0
93.31	Lake Alchichica	2.367	114688900	2.06e-05	62	48.4	10.08	0.258929	0	1	1	1	1																1	0	0
0.1	Texcoco	10	5000000	2e-06	1	0.5	90		1	1	1	1	1																0	1	0
80.29	Rincon de Parangueo	0.724	36200000	2e-08			120	1.11083	1	0	1	0	0																0	1	0
133.25	Salton Sea	970	7400000000	1.31e-07	13	8.8	45	0.266667	0	1	1	1	0																1	0	0
542.54	Laguna Chadilauquen	8.9	15050000	5.91e-07	2.4	1.78	24	1.08333	1	1	0	1	1																1	0	0
679.04	Laguna El Carancho	0.9	841000	1.07e-06	1.9	1.3	18.5	1.82703	1	0	0	1	1																1	0	0
583.04	Laguna Este Parque Luro	1.32	760000	1.74e-06	0.79	0.58	276	1.00362	1	0	1	1	1																1	0	0
631.41	Laguna Utracan	0.97	916000	1.06e-06	2.2	1.1	124.7	3.17562	1	0	1	1	1																1	0	0
360	Qarhan Salt Lake	5856	2928000	0.002	1.5	0.5	340		1	0	1	1	0																0	1	0
148	Qinghai Lake	4625.6	97125000	4.76252e-05	32.8	21	16	0.25	0	1	1	1	1																0	1	0

## Sheet: Endangered_sp
Endangered species	Lake
	Alligator reservoir
Barbus conocephalus	Aydar-Arnasay lake system
Abramis sapa	Aydar-Arnasay lake system
Alburnoides oblongus	Aydar-Arnasay lake system
Capoetobrama kuschakewitschi	Aydar-Arnasay lake system
Varanus griseus	Aydar-Arnasay lake system
Naja oxiana	Aydar-Arnasay lake system
Lycodon striatus	Aydar-Arnasay lake system
Oxyura leucocephala	Aydar-Arnasay lake system
Chettusia gregaria	Aydar-Arnasay lake system
Pelecanus crispus	Aydar-Arnasay lake system
Rufibrenta ruficollis	Aydar-Arnasay lake system
Anser erythropus	Aydar-Arnasay lake system
Haliaeetus lucoryphus	Aydar-Arnasay lake system
Coracias garrulus	Aydar-Arnasay lake system
Aythya nyroca	Aydar-Arnasay lake system
Marmaronetta angustirostris	Aydar-Arnasay lake system
Numenius arquata	Aydar-Arnasay lake system
Pandion haliaetus	Aydar-Arnasay lake system
Pelecanus onocrotalus	Aydar-Arnasay lake system
Phalacrocorax pygmaeus	Aydar-Arnasay lake system
Ciconia ciconia asiatica	Aydar-Arnasay lake system
Ciconia nigra	Aydar-Arnasay lake system
Cygnus cygnus	Aydar-Arnasay lake system
Hemiechinus hypomelas	Aydar-Arnasay lake system
Gazella subgutturosa	Aydar-Arnasay lake system
Rhinolophus hipposideros ssp. midas	Aydar-Arnasay lake system
Otonycteris hemprichii	Aydar-Arnasay lake system
Hemiechinus dauuricus	Bain-Tsagan lake
Otocolobus manul	Bain-Tsagan lake
Procapra gutturosa	Bain-Tsagan lake
Platalea leucor?dia	Bain-Tsagan lake
Ciconia nigra	Bain-Tsagan lake
Rufibrenta ruficollis	Bain-Tsagan lake
Anser erythropus	Bain-Tsagan lake
Eulabeia indica	Bain-Tsagan lake
Cygnopsis cygnoides	Bain-Tsagan lake
Cygnus bewickii	Bain-Tsagan lake
Anas formosa	Bain-Tsagan lake
Aix galericulata	Bain-Tsagan lake
Aythya baeri	Bain-Tsagan lake
Pandion haliaetus	Bain-Tsagan lake
Circus macrourus	Bain-Tsagan lake
Aquila rapax	Bain-Tsagan lake
Aquila clanga	Bain-Tsagan lake
Aquila heliaca	Bain-Tsagan lake
Aquila chrysaetos	Bain-Tsagan lake
Haliaeetus leucocephalus	Bain-Tsagan lake
Haliaeetus albicilla	Bain-Tsagan lake
Aegypius monachus	Bain-Tsagan lake
Falco rusticolus	Bain-Tsagan lake
Falco cherrug	Bain-Tsagan lake
Falco peregrinus	Bain-Tsagan lake
Falco naumanni	Bain-Tsagan lake
Grus japonensis	Bain-Tsagan lake
Grus leucogeranus	Bain-Tsagan lake
Grus vipio	Bain-Tsagan lake
Grus monacha	Bain-Tsagan lake
Anthropoides virgo	Bain-Tsagan lake
Otis tarda	Bain-Tsagan lake
Himantopus himantopus	Bain-Tsagan lake
Recurvirostra avosetta	Bain-Tsagan lake
Numenius madagascariensis	Bain-Tsagan lake
Limnodromus semipalmatus	Bain-Tsagan lake
Larus relictus	Bain-Tsagan lake
Larus saundersi	Bain-Tsagan lake
Hydroprogne caspia	Bain-Tsagan lake
Bubo bubo	Bain-Tsagan lake
Melanocorypha mongolica	Bain-Tsagan lake
?egalurus pryeri	Bain-Tsagan lake
Emberiza aureola	Bain-Tsagan lake
Eremias argus	Bain-Tsagan lake
Acipenser nudiventris	Balkhash
Pelecanus onocrotalus	Balkhash
Pelecanus crispus	Balkhash
Platalea leucorodia	Balkhash
Branta ruficollis	Balkhash
Cygnus cygnus	Balkhash
Aythya nyroca	Balkhash
Oxyura leucocephala	Balkhash
Pandion haliaetus	Balkhash
Sterna albifrons	Balkhash
Burhinus oedicnemus	Balkhash
Glareola pratincola	Balkhash
Plegadis falcinellus	Balkhash
Circaetus gallicus	Balkhash
Hieraaetus pennatus	Balkhash
Haliaeetus leucoryphus	Balkhash
Haliaeetus albicilla	Balkhash
Aquila heliaca	Balkhash
Aquila chrysaetos	Balkhash
Falco naumanni	Balkhash
Grus grus	Balkhash
Chlamydotis undulata	Balkhash
Pterocles orientalis	Balkhash
Columba eversmanni	Balkhash
Coracias garrulus	Balkhash
Vormela peregusna	Balkhash
Canis lupus	Balkhash
Gazella subgutturosa	Balkhash
Artemia urmiana	Lake Koyashskoye
	Lake Marfovskoye
	Lake Sakskoye
	Lake Sakskoye
	Lake Sakskoye
Artemia urmiana	Lake Sasyk-Sivash
	The Dead Sea
	Lake Doroninskoe
	Lake Doroninskoe
	Lake Doroninskoe
	Lake Doroninskoe
	Lake Doroninskoe
	Lake Doroninskoe
	Lake Doroninskoe
	Lake Doroninskoe
	Lake Doroninskoe
Oxyura leucocephala	Fuente de Piedra Lake
Chlidonias niger	Fuente de Piedra Lake
Marmaronetta angustirostris	Fuente de Piedra Lake
Fulica cristata	Fuente de Piedra Lake
Otis tarda	Fuente de Piedra Lake
Ciconia nigra	Fuente de Piedra Lake
Lestes macrostigma	Fuente de Piedra Lake
Althenia orientalis	Fuente de Piedra Lake
Otis tarda	Gallocanta Lake
Puccinellia pungens	Gallocanta Lake
Lythrum flexuosum	Gallocanta Lake
Microcnemum coralloides	Gallocanta Lake
Plantago mar¡tima	Gallocanta Lake
Glaux maritima	Gallocanta Lake
Branchinella buchananensis	Gidgee Lake
Stictonetta naevosa	Gidgee Lake
	Gidgee Lake
	Gidgee Lake
Phoeniconaias minor	Kamfers Dam
Phoenicopterus roseus	Kamfers Dam
Charadrius pallidus	Kamfers Dam
Falco naumanni	Kamfers Dam
	Kamfers Dam
	Kamfers Dam
Oxyura leucocephala	Kanibarazan Wetland
Aythya nyroca	Kanibarazan Wetland
	Kanibarazan Wetland
	Kanibarazan Wetland
	Kanibarazan Wetland
	Kanibarazan Wetland
Anas querquedula	Kelemen-sz‚k
Anser erythropus	Kelemen-sz‚k
Ardea purpurea	Kelemen-sz‚k
Ardeola ralloides	Kelemen-sz‚k
Aythya nyroca	Kelemen-sz‚k
Branta ruficollis	Kelemen-sz‚k
Charadrius alexandrinus	Kelemen-sz‚k
Chlidonias hybrida	Kelemen-sz‚k
Chlidonias leucopterus	Kelemen-sz‚k
Chlidonias niger	Kelemen-sz‚k
Ciconia ciconia	Kelemen-sz‚k
Ciconia nigra	Kelemen-sz‚k
Egretta alba	Kelemen-sz‚k
Egretta garzetta	Kelemen-sz‚k
Gallinago gallinago	Kelemen-sz‚k
Grus grus	Kelemen-sz‚k
Himantopus himantopus	Kelemen-sz‚k
Larus melanocephalus	Kelemen-sz‚k
Limosa limosa	Kelemen-sz‚k
Numenius arquata	Kelemen-sz‚k
Nycticorax nycticorax	Kelemen-sz‚k
Platalea leucorodia	Kelemen-sz‚k
Plegadis falcinellus	Kelemen-sz‚k
Podiceps nigricollis	Kelemen-sz‚k
Recurvirostra avosetta	Kelemen-sz‚k
Sterna hirundo	Kelemen-sz‚k
Tringa stagnatilis	Kelemen-sz‚k
Tringa totanus	Kelemen-sz‚k
	Kelemen-sz‚k
	Kelemen-sz‚k
	Kelemen-sz‚k
	Kelemen-sz‚k
	Kelemen-sz‚k
	Kelemen-sz‚k
	Kelemen-sz‚k
	Kelemen-sz‚k
	Kelemen-sz‚k
	Kelemen-sz‚k
	Kelemen-sz‚k
	Kelemen-sz‚k
	Kelemen-sz‚k
	Kelemen-sz‚k
	Kelemen-sz‚k
	Kelemen-sz‚k
	Kelemen-sz‚k
	Kelemen-sz‚k
	Kelemen-sz‚k
	Kelemen-sz‚k
	Kelemen-sz‚k
	Kelemen-sz‚k
	Kelemen-sz‚k
	Kelemen-sz‚k
	Kelemen-sz‚k
	Kelemen-sz‚k
	Kelemen-sz‚k
	Kelemen-sz‚k
	Kelemen-sz‚k
	Kelemen-sz‚k
	Kelemen-sz‚k
	Kelemen-sz‚k
	Kelemen-sz‚k
	Kelemen-sz‚k
	Kelemen-sz‚k
	Kelemen-sz‚k
	Kelemen-sz‚k
Marmota sibirica	Lake Khukh
Vespertilio superans	Lake Khukh
	Lake Khukh
Botaurus stellaris	Lake Khukh
Ardea purpurea	Lake Khukh
Rufibrenta ruficollis	Lake Khukh
Anser erythropus	Lake Khukh
Anser albifrons	Lake Khukh
Anas formosa	Lake Khukh
Anas falcata	Lake Khukh
Aquila clanga	Lake Khukh
Aquila heliaca	Lake Khukh
Haliaeetus leucocephalus	Lake Khukh
Haliaeetus albicilla	Lake Khukh
Grus japonensis	Lake Khukh
Grus leucogeranus	Lake Khukh
Grus vipio	Lake Khukh
Grus monacha	Lake Khukh
Grus grus	Lake Khukh
Otis tarda	Lake Khukh
Limnodromus semipalmatus	Lake Khukh
Larus relictus	Lake Khukh
Emberiza aureola	Lake Khukh
Preslia cervina	Laguna de Alcahozo
Aythya nyroca	Laguna de Alcahozo
Aythya ferina	Laguna de Alcahozo
Marmaronetta angustirostris	Laguna de Alcahozo
Oxyura leucocephala	Laguna de Alcahozo
	Laguna de Alcahozo
	Laguna de Alcahozo
	Laguna de Alcahozo
	Laguna de Alcahozo
Riella helicophylla	Laguna de los Tollos
Puccinellia fasciculata	Laguna de los Tollos
Ardeola ralloides	Laguna de los Tollos
Aythya nyroca	Laguna de los Tollos
Chlidonias niger	Laguna de los Tollos
Circus pygargus	Laguna de los Tollos
Fulica cristata	Laguna de los Tollos
Marmaronetta angustirostris	Laguna de los Tollos
Oxyura leucocephala	Laguna de los Tollos
	Laguna de los Tollos
	Laguna de los Tollos
	Laguna de los Tollos
	Laguna de los Tollos
	Laguna de los Tollos
	Laguna de los Tollos
	Laguna de los Tollos
	Laguna de los Tollos
	Laguna de los Tollos
	Laguna de los Tollos
	Laguna de los Tollos
	Laguna de los Tollos
	Laguna de los Tollos
	Laguna de los Tollos
	Laguna de los Tollos
	Laguna de los Tollos
Preslia cervina	Laguna de Manjavacas
Aythya nyroca	Laguna de Manjavacas
Vanellus vanellus	Laguna de Manjavacas
Calidris canutus	Laguna de Manjavacas
Calidris ferrug¡nea	Laguna de Manjavacas
Limosa limosa	Laguna de Manjavacas
Aythya ferina	Laguna de Manjavacas
	Laguna de Manjavacas
Marmaronetta angustirostris	Laguna de Manjavacas
Emberiza schoeniclus	Laguna de Manjavacas
	Laguna de Manjavacas
	Laguna de Manjavacas
	Laguna de Manjavacas
	Laguna de Manjavacas
	Laguna de Manjavacas
	Laguna de Manjavacas
Phoeniconaias minor	Lake Abijata
Oreochromis niloticus	Lake Abijata
	Lake Abijata
	Lake Abijata
	Lake Abijata
	Lake Abijata
	Lake Abijata
	Lake Abijata
	Lake Abijata
	Lake Abijata
Charadrius alexandrinus	Lake Baskunchak
Himantopus himantopus	Lake Baskunchak
Anthropoides virgo	Lake Baskunchak
Recurvirostra avosetta	Lake Baskunchak
Phoeniconaias minor	Lake Bogoria
Acinonyx jubatus	Lake Bogoria
Polemaetus bellicoses	Lake Bogoria
Trigonoceps occipitalis	Lake Bogoria
Tecticornia mellaria	Lake Carey
	Lake Carey
	Lake Carey
	Lake Carey
	Lake Carey
	Lake Carey
	Lake Carey
	Lake Carey
	Lake Carey
	Lake Carey
	Lake Carey
	Lake Carey
	Lake Carey
	Lake Carey
	Lake Carey
	Lake Carey
	Lake Carey
	Lake Carey
	Lake Carey
	Lake Carey
	Lake Carey
	Lake Carey
	Lake Carey
	Lake Carey
	Lake Carey
	Lake Carey
	Lake Carey
	Lake Carey
	Lake Carey
	Lake Carey
	Lake Carey
	Lake Carey
	Lake Carey
	Lake Carey
	Lake Carey
	Lake Carey
	Lake Carey
	Lake Carey
	Lake Carey
	Lake Carey
	Lake Carey
	Lake Carey
	Lake Carey
	Lake Carey
	Lake Carey
	Lake Carey
	Lake Carey
	Lake Carey
	Lake Carey
	Lake Carey
	Lake Carey
	Lake Carey
	Lake Carey
	Lake Carey
	Lake Carey
	Lake Carey
	Lake Carey
	Lake Carey
	Lake Carey
	Lake Carey
	Lake Carey
	Lake Carey
	Lake Carey
	Lake Carey
	Lake Carey
	Lake Carey
	Lake Carey
	Lake Carey
	Lake Carey
	Lake Carey
	Lake Carey
	Lake Carey
	Lake Carey
	Lake Carey
	Lake Carey
Ardea purpurea	Salada de Chiprana
Egretta garzetta	Salada de Chiprana
Ixobrychus minutus	Salada de Chiprana
Ciconia ciconia	Salada de Chiprana
Circus aeruginosus	Salada de Chiprana
Circus cyaneus	Salada de Chiprana
Circus pygargus	Salada de Chiprana
Pandion haliaetus	Salada de Chiprana
Himantopus himantopus	Salada de Chiprana
Recurvirostra avosetta	Salada de Chiprana
Burhinus oedicnemus	Salada de Chiprana
Pluvialis apricaria	Salada de Chiprana
Tringa glareola	Salada de Chiprana
Chlidonias niger	Salada de Chiprana
Melanocorypha calandra	Salada de Chiprana
Calandrella brachydactyla	Salada de Chiprana
Galerida theklae	Salada de Chiprana
Lullula arborea	Salada de Chiprana
Anthus campestris	Salada de Chiprana
Sylvia undata	Salada de Chiprana
Grus grus	Salada de Chiprana
Phoenicopterus ruber	Salada de Chiprana
Aythya nyroca	Salada de Chiprana
Milvus migrans	Salada de Chiprana
Circaetus gallicus	Salada de Chiprana
Aquila chrysaetos	Salada de Chiprana
Falco naumanni	Salada de Chiprana
Falco columbarius	Salada de Chiprana
Porzana porzana	Salada de Chiprana
Philomachus pugnax	Salada de Chiprana
Gelochelidon nilotica	Salada de Chiprana
Sterna albifrons	Salada de Chiprana
Chlidonias hybrida	Salada de Chiprana
Pterocles orientalis	Salada de Chiprana
Bubo bubo	Salada de Chiprana
Limosa lapponica	Salada de Chiprana
Rhinolophus ferrumequinum	Salada de Chiprana
Myotis myotis	Salada de Chiprana
Myotis blythii	Salada de Chiprana
Poa sallacustris	Lake Corangamite
Lepidium aschersonii	Lake Corangamite
Eulamprus tympanum marnieae	Lake Corangamite
	Lake Corangamite
	Lake Corangamite
Phoenicoparrus andinus	Laguna Diamante
Phoenicoparrus jamesi	Laguna Diamante
Phoenicopterus chilensis	Laguna Diamante
Fulica cornuta	Laguna Diamante
Leopardus jacobita	Laguna Diamante
Chinchilla chinchilla	Laguna Diamante
	Laguna Diamante
	Laguna Diamante
	Laguna Diamante
	Laguna Diamante
	Lake Dunino
	Lake Dunino
Phoeniconaias minor	Lake Elementeita
Panthera pardus	Lake Elementeita
Giraffa camelopardalis ssp. Rothschildi	Lake Elementeita
Necrosyrtes monachus	Lake Elementeita
Gyps rueppelli	Lake Elementeita
Gyps africanus	Lake Elementeita
Bitis worthingtonii	Lake Elementeita
	Lake Elton
	Lake Elton
	Lake Elton
	Lake Eyre
	Lake Eyre
	Lake Eyre
	Lake Eyre
	Lake Eyre
	Lake Eyre
	Lake Eyre
	Lake Gairdner
	Lake Gairdner
Lathamus discolor	Lake George
Delma impar	Lake George
Xanthomyza phrygia	Lake George
Plegadis falcinellus	Lake George
Ardea alba	Lake George
Ardeola ibis	Lake George
Gallinago hardwickii	Lake George
Haliaeetus leucogaster	Lake George
Limosa lapponica	Lake George
Tringa stagnatilis	Lake George
Tringa glareola	Lake George
Calidris acuminata	Lake George
Calidris ferruginea	Lake George
Tringa nebularia	Lake George
Hydropogne caspia	Lake George
Litoria aurea	Lake George
Litoria raniformis	Lake George
Aprasia parapulchella	Lake George
Varanus rosenbergi	Lake George
Stictonetta naevosa	Lake George
Botaurus poiciloptilus	Lake George
Pandion haliaetus	Lake George
Falco hypoleucos	Lake George
Rostratula benghalensis	Lake George
Cacatua leadbeateri	Lake George
Polytelis swainsonii	Lake George
Pachycephala olivacea	Lake George
Miniopterus schreibersii	Lake George
Wilsonia rotundifolia	Lake George
Phoenicoparrus andinus	Laguna Grande
Phoenicoparrus jamesi	Laguna Grande
Phoenicopterus chilensis	Laguna Grande
Fulica cornuta	Laguna Grande
Leopardus jacobita	Laguna Grande
Chinchilla chinchilla	Laguna Grande
	Laguna Grande
	Laguna Grande
	Laguna Grande
	Laguna Grande
	Laguna Grande
	Laguna Grande
	Laguna Grande
	Laguna Grande
Ardea cinerea	Lake Katwe
	Lake Katwe
	Lake Katwe
	Lake Katwe
Ardea cinerea	Lake Kikorongo
Ardea alba	Lake Kikorongo
Ardea goliath	Lake Kikorongo
Rynchops flavirostris	Lake Kikorongo
Ephippiorhynchus senegalensis	Lake Kikorongo
	Lake Kikorongo
	Lake Kikorongo
Lemna gibba	Lake Kisezers
Zannichellia palustris	Lake Kisezers
Mergus merganser	Lake Kisezers
Larus ridibundus	Lake Kisezers
Crex crex	Lake Kisezers
Botaurus stellaris	Lake Kisezers
Podiceps auritus	Lake Kisezers
Circus aeruginosus	Lake Kisezers
Locustella luscinioides	Lake Kisezers
Remiz pendulinus	Lake Kisezers
Lanius collurio	Lake Kisezers
Jynx torquilla	Lake Kisezers
Leuciscus aspius	Lake Kisezers
Cobitis taenia	Lake Kisezers
Coregonus lavaretus	Lake Kisezers
Lampetra fluviatilis	Lake Kisezers
Leucaspius delineatus	Lake Kisezers
Misgurnus fossilis	Lake Kisezers
Pelecus cultratus	Lake Kisezers
Rhodeus amarus	Lake Kisezers
Salmo salar	Lake Kisezers
Salmo trutta	Lake Kisezers
Silurus glanis	Lake Kisezers
Vimba vimba	Lake Kisezers
Acroloxus lacustris	Lake Kisezers
Anodonta cygnea	Lake Kisezers
Limonium suffruticosum	Lake Krasnovishnevoye
Scorzonera ensifolia	Lake Krasnovishnevoye
	Lake Krasnovishnevoye
Allactaga major	Lake Krasnovishnevoye
Phalacrocorax carbo sinensis	Lake Krasnovishnevoye
Pelecanus crispus	Lake Krasnovishnevoye
Ardea alba	Lake Krasnovishnevoye
Rufibrenta ruficollis	Lake Krasnovishnevoye
Oxyura leucocephala	Lake Krasnovishnevoye
Circus macrourus	Lake Krasnovishnevoye
Circus pygargus	Lake Krasnovishnevoye
Falco rusticolus	Lake Krasnovishnevoye
Anthropoides virgo	Lake Krasnovishnevoye
Himantopus himantopus	Lake Krasnovishnevoye
Recurvirostra avosetta	Lake Krasnovishnevoye
Numenius arquata	Lake Krasnovishnevoye
Limnodromus semipalmatus	Lake Krasnovishnevoye
Glareola nordmanni	Lake Krasnovishnevoye
Melanocorypha leucoptera	Lake Krasnovishnevoye
Emberiza aureola	Lake Krasnovishnevoye
Najas marina	Lake Liepaja
Cladium mariscus	Lake Liepaja
Potamogeton rutilus	Lake Liepaja
Zannichella palustris	Lake Liepaja
Anser anser	Lake Liepaja
Branta leucopsis	Lake Liepaja
Cygnus columbianus	Lake Liepaja
Cygnus cygnus	Lake Liepaja
Mergus merganser	Lake Liepaja
Calidris alpina schinzii	Lake Liepaja
Charadrius hiaticula	Lake Liepaja
Chlidonias hybrida	Lake Liepaja
Chlidonias leucopterus	Lake Liepaja
Chlidonias niger	Lake Liepaja
Gallinago media	Lake Liepaja
Larus minutus	Lake Liepaja
Larus ridibundus	Lake Liepaja
Limosa limosa	Lake Liepaja
Lymnocryptes minimus	Lake Liepaja
Numenius arquata	Lake Liepaja
Numenius phaeopus	Lake Liepaja
Philomachus pugnax	Lake Liepaja
Pluvialis apricaria	Lake Liepaja
Sterna albifrons	Lake Liepaja
Sterna caspia	Lake Liepaja
Sterna hirundo	Lake Liepaja
Sterna sandvicensis	Lake Liepaja
Tringa glareola	Lake Liepaja
Tringa totanus	Lake Liepaja
Ciconia ciconia	Lake Liepaja
Alcedo atthis	Lake Liepaja
Gavia stellata	Lake Liepaja
Crex crex	Lake Liepaja
Grus grus	Lake Liepaja
Porzana parva	Lake Liepaja
Porzana porzana	Lake Liepaja
Botaurus stellaris	Lake Liepaja
Egretta alba	Lake Liepaja
Ixobrychus minutus	Lake Liepaja
Podiceps auritus	Lake Liepaja
Tachybaptus ruficollis	Lake Liepaja
Circus aeruginosus	Lake Liepaja
Circus cyaneus	Lake Liepaja
Circus pygargus	Lake Liepaja
Falco columbarius	Lake Liepaja
Falco peregrinus	Lake Liepaja
Haliaeetus albicilla	Lake Liepaja
Pandion haliaetus	Lake Liepaja
Locustella luscinioides	Lake Liepaja
Acrocephalus paludicola	Lake Liepaja
Remiz pendulinus	Lake Liepaja
Lanius collurio	Lake Liepaja
Lanius excubitor	Lake Liepaja
Cobitis taenia	Lake Liepaja
Rhodeus sericeus amarus	Lake Liepaja
Lampetra fluviatilis	Lake Liepaja
Salmo trutta	Lake Liepaja
Pelecus cultratus	Lake Liepaja
Alburnus albidus	Lake Liepaja
Misgurnus fossilis	Lake Liepaja
Cottus gobio	Lake Liepaja
Dolomedes plantarius	Lake Liepaja
Dytiscus latissimus	Lake Liepaja
Theodoxus fluviatilis	Lake Liepaja
Myxas glutinosa	Lake Liepaja
Musculium lacustre	Lake Liepaja
Lutra lutra	Lake Liepaja
Castor fiber	Lake Liepaja
Ligularia thyrsoidea	Lake Malinovoe
Sphaerophysa salsula	Lake Malinovoe
Iris glaucescens	Lake Malinovoe
Stipa pennata	Lake Malinovoe
Stipa zalesskii	Lake Malinovoe
Ardea alba	Lake Malinovoe
Tadorna ferruginea	Lake Malinovoe
Netta rufina	Lake Malinovoe
Haliaeetus albicilla	Lake Malinovoe
Falco cherrug	Lake Malinovoe
Recurvirostra avosetta	Lake Malinovoe
Anthropoides virgo	Lake Malinovoe
Numenius arquata	Lake Malinovoe
Bubo bubo	Lake Malinovoe
Dipus sagitta	Lake Malinovoe
Misgurnus fossilis	Lake Neusiedl
Umbra krameri	Lake Neusiedl
Cricetus cricetus	Lake Neusiedl
	Lake Neusiedl
	Lake Neusiedl
	Lake Neusiedl
	Lake Neusiedl
	Lake Neusiedl
	Lake Neusiedl
	Lake Neusiedl
	Lake Neusiedl
	Lake Neusiedl
	Lake Neusiedl
	Lake Neusiedl
	Lake Neusiedl
	Lake Neusiedl
	Lake Neusiedl
	Lake Neusiedl
	Lake Neusiedl
	Lake Neusiedl
	Lake Neusiedl
	Lake Neusiedl
	Lake Neusiedl
	Lake Neusiedl
	Lake Neusiedl
	Lake Neusiedl
	Lake Neusiedl
	Lake Neusiedl
	Lake Neusiedl
	Lake Neusiedl
	Lake Neusiedl
	Lake Neusiedl
	Lake Neusiedl
	Lake Neusiedl
	Lake Neusiedl
	Lake Neusiedl
	Lake Neusiedl
	Lake Nozhiy
Phoeniconaias minor	Lake Oloidien
Fulica cristata	Lake Oloidien
Haliaeetus vocifer	Lake Oloidien
Ceryle rudis	Lake Oloidien
Prionops poliolophus	Lake Oloidien
Actophilornis africanus	Lake Oloidien
Anhinga rufa	Lake Oloidien
Hippopotamus amphibius	Lake Oloidien
	Lake Oloidien
	Lake Oloidien
	Lake Oloidien
	Lake Oloidien
	Lake Oloidien
	Lake Oloidien
	Lake Oloidien
	Lake Oloidien
	Lake Oloidien
	Lake Oloidien
	Lake Oloidien
	Lake Oloidien
	Lake Oloidien
	Lake Oloidien
	Lake Oloidien
	Lake Oloidien
	Lake Oloidien
	Lake Oloidien
	Lake Oloidien
	Lake Oloidien
	Lake Oloidien
	Lake Oloidien
	Lake Oloidien
Cladium mariscus	Lake Pape
Littorella uniflora	Lake Pape
Najas marina	Lake Pape
Anser anser	Lake Pape
Anser erythropus	Lake Pape
Branta leucopsis	Lake Pape
Cygnus columbianus	Lake Pape
Cygnus cygnus	Lake Pape
Mergus albellus	Lake Pape
Mergus merganser	Lake Pape
Tadorna tadorna	Lake Pape
Polysticta stelleri	Lake Pape
Calidris alpina schinzii	Lake Pape
Charadrius hiaticula	Lake Pape
Chlidonias hybrida	Lake Pape
Chlidonias leucopterus	Lake Pape
Chlidonias niger	Lake Pape
Gallinago media	Lake Pape
Larus minutus	Lake Pape
Larus ridibundus	Lake Pape
Limosa limosa	Lake Pape
Lymnocryptes minimus	Lake Pape
Numenius arquata	Lake Pape
Numenius phaeopus	Lake Pape
Phalaropus lobatus	Lake Pape
Philomachus pugnax	Lake Pape
Pluvialis apricaria	Lake Pape
Recurvirostra avosetta	Lake Pape
Sterna albifrons	Lake Pape
Sterna caspia	Lake Pape
Sterna hirundo	Lake Pape
Sterna hirundo	Lake Pape
Sterna sandvicensis	Lake Pape
Tringa glareola	Lake Pape
Tringa totanus	Lake Pape
Ciconia ciconia	Lake Pape
Ciconia nigra	Lake Pape
Alcedo atthis	Lake Pape
Gavia stellata	Lake Pape
Gavia arctica	Lake Pape
Crex crex	Lake Pape
Grus grus	Lake Pape
Porzana parva	Lake Pape
Porzana porzana	Lake Pape
Botaurus stellaris	Lake Pape
Egretta alba	Lake Pape
Ixobrychus minutus	Lake Pape
Plegadis falcinellus	Lake Pape
Podiceps auritus	Lake Pape
Tachybaptus ruficollis	Lake Pape
Oceanodroma leucorhoa	Lake Pape
Aquila pomarina	Lake Pape
Aquila clanga	Lake Pape
Aquila chrysaetos	Lake Pape
Circaetus gallicus	Lake Pape
Circus aeruginosus	Lake Pape
Circus cyaneus	Lake Pape
Circus pygargus	Lake Pape
Falco columbarius	Lake Pape
Falco peregrinus	Lake Pape
Falco tinnunculus	Lake Pape
Falco vespertinus	Lake Pape
Haliaeetus albicilla	Lake Pape
Milvus migrans	Lake Pape
Milvus milvus	Lake Pape
Pandion haliaetus	Lake Pape
Pernis apivorus	Lake Pape
Acrocephalus paludicola	Lake Pape
Locustella luscinioides	Lake Pape
Remiz pendulinus	Lake Pape
Lanius collurio	Lake Pape
Lanius excubitor	Lake Pape
Lanius minor	Lake Pape
Leuciscus aspius	Lake Pape
Lampetra fluviatilis	Lake Pape
Rhodeus sericeus	Lake Pape
Salmo trutta	Lake Pape
Astacus astacus	Lake Pape
Segmentina nitida	Lake Pape
Myxas glutinosa	Lake Pape
Theodoxus fluviatilis	Lake Pape
Dytiscus latissimus	Lake Pape
Castor fiber	Lake Pape
Lutra lutra	Lake Pape
	Lake Razval
	Lake Razval
	Lake Razval
Ardea purpurea	Lake Sarpa
Platalea leucorodia	Lake Sarpa
Plegadis falcinellus	Lake Sarpa
Cygnus olor	Lake Sarpa
Buteo rufinus	Lake Sarpa
Aquila rapax	Lake Sarpa
Haliaeetus albicilla	Lake Sarpa
Anthropoides virgo	Lake Sarpa
Tetrax tetrax	Lake Sarpa
Otis tarda	Lake Sarpa
Astragalus dasyanthus	Lake Sarpa
Dianthus polymorphus	Lake Sarpa
Limonium suffruticosum	Lake Sarpa
Nitraria schoberi	Lake Sarpa
Tulipa biflora	Lake Sarpa
Phoeniconaias minor	Lake Shala
	Lake Shala
	Lake Shala
	Lake Shala
	Lake Shala
	Lake Shala
	Lake Shala
	Lake Shala
	Lake Shala
Numenius arquata	Lake Shira
Recurvirostra avosetta	Lake Shira
Oxyura leucocephala	Lake Shira
Gavia arctica	Lake Shira
	Lake Shira
	Lake Shira
	Lake Shira
Rollandia microptera	Lake Titicaca
Telmatobius culeus	Lake Titicaca
Dama mesopotamica	Lake Urmia
Ovis gmelini	Lake Urmia
	Lake Wyara
	Lake Wyara
	Lake Wyara
	Lake Wyara
	Lake Wyara
	Lake Wyara
	Lake Torrens
	Lake Torrens
	Lake Torrens
	Lake Torrens
	Lake Torrens
	Lake Torrens
	Lake Torrens
	Lake Torrens
	Lake Torrens
	Lake Torrens
	Lake Torrens
	Lake Torrens
	Mar Chiquita Lake
Larus audouinii	Mar Menor
Limosa limosa	Mar Menor
Marmaronetta angustirostris	Mar Menor
Numenius arquata	Mar Menor
Sylvia undata	Mar Menor
Miniopterus schreibersii	Mar Menor
Myotis capaccinii	Mar Menor
Rhinolophus euryale	Mar Menor
Rhinolophus ferrumequinum	Mar Menor
Anguilla anguilla	Mar Menor
Aphanius iberus	Mar Menor
Chalcides bedriagai	Mar Menor
Timon lepidus	Mar Menor
Alcedo atthis	Mar Menor
Anas clypeata	Mar Menor
Anas crecca	Mar Menor
Asio flammeus	Mar Menor
Burhinus oedicnemus	Mar Menor
Calandrella brachydactyla	Mar Menor
Charadrius alexandrinus	Mar Menor
Chlidonias hybrida	Mar Menor
Chlidonias niger	Mar Menor
Emberiza schoeniclus	Mar Menor
Gallinago gallinago	Mar Menor
Gelochelidon nilotica	Mar Menor
Glareola pratincola	Mar Menor
Haematopus ostralegus	Mar Menor
Lanius meridionalis	Mar Menor
Lanius senator	Mar Menor
Larus audouinii	Mar Menor
Larus genei	Mar Menor
Limosa limosa	Mar Menor
Locustella luscinioides	Mar Menor
Luscinia svecica	Mar Menor
Marmaronetta angustirostris	Mar Menor
Numenius arquata	Mar Menor
Oenanthe hispanica	Mar Menor
Pandion haliaetus	Mar Menor
Phoenicopterus ruber	Mar Menor
Phoenicurus phoenicurus	Mar Menor
Phylloscopus trochiloides	Mar Menor
Phylloscopus trochilus	Mar Menor
Platalea leucorodia	Mar Menor
Podiceps nigricollis	Mar Menor
Sterna albifrons	Mar Menor
Sterna hirundo	Mar Menor
Sterna sandvicensis	Mar Menor
Streptopelia turtur	Mar Menor
Tadorna tadorna	Mar Menor
Tringa totanus	Mar Menor
Miniopterus schreibersii	Mar Menor
Myotis capaccinii	Mar Menor
Myotis myotis	Mar Menor
Rhinolophus euryale	Mar Menor
Rhinolophus ferrumequinum	Mar Menor
Anguilla anguilla	Mar Menor
Aphanius iberus	Mar Menor
Chalcides bedriagai	Mar Menor
	Mar Menor
	Mar Menor
	Mar Menor
	Mar Menor
	Mono Lake
Ardeola idae	Lake Nakuru
Ceratotherium simum	Lake Nakuru
Diceros bicornis	Lake Nakuru
Giraffa camelopardalis ssp. Rothschildi	Lake Nakuru
Pantera leo	Lake Nakuru
Hippopotamus amphibious	Lake Nakuru
Acinonyx jubatus	Lake Nakuru
Prionops poliolophus	Lake Nakuru
Phoeniconaias minor	Lake Nakuru
Panthera pardus	Lake Nakuru
Polemaetus bellicosus	Lake Nakuru
Candelacypris aragonica	Playa Lake
Branchynectella media	Playa Lake
Heterocypris barbara	Playa Lake
Acanthodactylus erythrurus	Playa Lake
Chersophilus duponti	Playa Lake
Otis tarda	Playa Lake
Tetrax tetrax	Playa Lake
Pterocles alchata	Playa Lake
Pterocles orientalis	Playa Lake
Falco naumanni	Playa Lake
Limonium stenophyllum	Playa Lake
Limonium catalaunicum	Playa Lake
Microcnemum coralloides	Playa Lake
Halopeplis amplexicaulis	Playa Lake
Pterygoneurum sampaianum	Playa Lake
Riella helycophylla	Playa Lake
	Playa Lake
Phoeniconaias minor	Sambhar Salt Lake
	Sambhar Salt Lake
	Sambhar Salt Lake
	Sambhar Salt Lake
	Sambhar Salt Lake
	Sambhar Salt Lake
	Sambhar Salt Lake
	Sambhar Salt Lake
	Sambhar Salt Lake
	Sambhar Salt Lake
	Sambhar Salt Lake
Tecticornia flabelliformis	Seagull Lake
Arenaria interpres	Seagull Lake
Calidris alba	Seagull Lake
Calidris acuminata	Seagull Lake
Calidris ferruginea	Seagull Lake
Calidris ruficollis	Seagull Lake
Calidris tenuirostris	Seagull Lake
Charadrius mongolus	Seagull Lake
Tringa nebularia	Seagull Lake
Hydroprogne caspia	Seagull Lake
Pluvialis squatarola	Seagull Lake
Tringa brevipes	Seagull Lake
Tringa nebularia	Seagull Lake
Haliaeetus leucogaster	Seagull Lake
Sternula nereis	Seagull Lake
	Seagull Lake
Cladorhynchus leucocephalus	Seagull Lake
Thinornis rubricollis	Seagull Lake
Arenaria interpres	Seagull Lake
Calidris alba	Seagull Lake
Charadrius mongolus	Seagull Lake
Haematopus longirostris	Seagull Lake
	Seagull Lake
Anser erythropus	Slano Kopovo
Aythya nyroca	Slano Kopovo
Branta ruficollis	Slano Kopovo
Limosa limosa	Slano Kopovo
Numenius arquata	Slano Kopovo
	Slano Kopovo
	Slano Kopovo
	Slano Kopovo
	Slano Kopovo
	Slano Kopovo
	Slano Kopovo
	Slano Kopovo
	Slano Kopovo
	Slano Kopovo
	Slano Kopovo
	Slano Kopovo
	Slano Kopovo
	Slano Kopovo
	Slano Kopovo
	Slano Kopovo
	Slano Kopovo
	Slano Kopovo
	Slano Kopovo
	Slano Kopovo
	Slano Kopovo
	Slano Kopovo
	Slano Kopovo
	Slano Kopovo
	Slano Kopovo
	Slano Kopovo
	Slano Kopovo
	Slano Kopovo
	Slano Kopovo
	Slano Kopovo
	Slano Kopovo
	Slano Kopovo
	Slano Kopovo
	Slano Kopovo
	Slano Kopovo
	Slano Kopovo
	Slano Kopovo
	Slano Kopovo
	Slano Kopovo
	Slano Kopovo
	Slano Kopovo
	Slano Kopovo
	Slano Kopovo
	Slano Kopovo
	Slano Kopovo
	Slano Kopovo
	Slano Kopovo
	Slano Kopovo
	Slano Kopovo
	Slano Kopovo
	Slano Kopovo
	Slano Kopovo
	Slano Kopovo
	Slano Kopovo
	Slano Kopovo
	Slano Kopovo
	Slano Kopovo
	Slano Kopovo
	Slano Kopovo
	Slano Kopovo
	Slano Kopovo
Barbus balcanicus	Seewinkel Soda Pans
Umbra krameri	Seewinkel Soda Pans
Corixa panzeri	Seewinkel Soda Pans
Hebrus pusillus	Seewinkel Soda Pans
Hebrus ruficeps	Seewinkel Soda Pans
Hydrometra gracilenta	Seewinkel Soda Pans
Gerris asper	Seewinkel Soda Pans
Lycosa singoriensis	Seewinkel Soda Pans
Lamyctes emarginatus	Seewinkel Soda Pans
Lepidurus apus	Seewinkel Soda Pans
Triops cancriformis	Seewinkel Soda Pans
Chondrosoma fiduciaria	Seewinkel Soda Pans
Diachrysia zosimi	Seewinkel Soda Pans
Lignyoptera fumidaria	Seewinkel Soda Pans
Maculinea alcon	Seewinkel Soda Pans
Maculinea nausitous	Seewinkel Soda Pans
Maculinea teleius	Seewinkel Soda Pans
Sedina buettneri	Seewinkel Soda Pans
Anser anser	Seewinkel Soda Pans
Calidris alpina	Seewinkel Soda Pans
Charadrius alexandrinus	Seewinkel Soda Pans
Charadrius dubius	Seewinkel Soda Pans
Circus aeruginosus	Seewinkel Soda Pans
Gallinago gallinago	Seewinkel Soda Pans
Himantopus himantopus	Seewinkel Soda Pans
Limosa limosa	Seewinkel Soda Pans
Numenius arquata	Seewinkel Soda Pans
Philomachus pugnax	Seewinkel Soda Pans
Platalea leucorodia	Seewinkel Soda Pans
Sterna hirundo	Seewinkel Soda Pans
Tringa erythropus	Seewinkel Soda Pans
Tringa nebularia	Seewinkel Soda Pans
Tringa stagnatilis	Seewinkel Soda Pans
Tringa totanus	Seewinkel Soda Pans
Vanellus vanellus	Seewinkel Soda Pans
Spermophilus citellus	Seewinkel Soda Pans
	Seewinkel Soda Pans
	Seewinkel Soda Pans
	Seewinkel Soda Pans
	Seewinkel Soda Pans
	Seewinkel Soda Pans
	Seewinkel Soda Pans
	Seewinkel Soda Pans
	Seewinkel Soda Pans
	Seewinkel Soda Pans
Hemiechinus dauuricus	Lake Barun-Torey
Otocolobus manul	Lake Barun-Torey
Procapra gutturosa	Lake Barun-Torey
Marmota sibirica	Lake Barun-Torey
Platalea leucor?dia	Lake Barun-Torey
Rufibrenta ruficollis	Lake Barun-Torey
Anser erythropus	Lake Barun-Torey
Eulabeia indica	Lake Barun-Torey
Cygnopsis cygnoides	Lake Barun-Torey
Cygnus bewickii	Lake Barun-Torey
Anas formosa	Lake Barun-Torey
Aix galericulata	Lake Barun-Torey
Aythya baeri	Lake Barun-Torey
Pandion haliaetus	Lake Barun-Torey
Circus macrourus	Lake Barun-Torey
Aquila rapax	Lake Barun-Torey
Aquila clanga	Lake Barun-Torey
Aquila heliaca	Lake Barun-Torey
Aquila chrysaetos	Lake Barun-Torey
Haliaeetus leucocephalus	Lake Barun-Torey
Haliaeetus albicilla	Lake Barun-Torey
Aegypius monachus	Lake Barun-Torey
Falco rusticolus	Lake Barun-Torey
Falco cherrug	Lake Barun-Torey
Falco peregrinus	Lake Barun-Torey
Falco naumanni	Lake Barun-Torey
Grus japonensis	Lake Barun-Torey
Grus leucogeranus	Lake Barun-Torey
Grus vipio	Lake Barun-Torey
Grus monacha	Lake Barun-Torey
Anthropoides virgo	Lake Barun-Torey
Otis tarda	Lake Barun-Torey
Himantopus himantopus	Lake Barun-Torey
Recurvirostra avosetta	Lake Barun-Torey
Numenius madagascariensis	Lake Barun-Torey
Limnodromus semipalmatus	Lake Barun-Torey
Larus relictus	Lake Barun-Torey
Larus saundersi	Lake Barun-Torey
Hydroprogne caspia	Lake Barun-Torey
Bubo bubo	Lake Barun-Torey
Melanocorypha mongolica	Lake Barun-Torey
?egalurus pryeri	Lake Barun-Torey
Emberiza aureola	Lake Barun-Torey
Eremias argus	Lake Barun-Torey
Tripogon chinensis	Lake Barun-Torey
Asparagus brachyphyllus	Lake Barun-Torey
Hemiechinus dauuricus	Lake Zun-Torey
Otocolobus manul	Lake Zun-Torey
Procapra gutturosa	Lake Zun-Torey
Marmota sibirica	Lake Zun-Torey
Platalea leucor?dia	Lake Zun-Torey
Rufibrenta ruficollis	Lake Zun-Torey
Anser erythropus	Lake Zun-Torey
Eulabeia indica	Lake Zun-Torey
Cygnopsis cygnoides	Lake Zun-Torey
Cygnus bewickii	Lake Zun-Torey
Anas formosa	Lake Zun-Torey
Aix galericulata	Lake Zun-Torey
Aythya baeri	Lake Zun-Torey
Pandion haliaetus	Lake Zun-Torey
Circus macrourus	Lake Zun-Torey
Aquila rapax	Lake Zun-Torey
Aquila clanga	Lake Zun-Torey
Aquila heliaca	Lake Zun-Torey
Aquila chrysaetos	Lake Zun-Torey
Haliaeetus leucocephalus	Lake Zun-Torey
Haliaeetus albicilla	Lake Zun-Torey
Aegypius monachus	Lake Zun-Torey
Falco rusticolus	Lake Zun-Torey
Falco cherrug	Lake Zun-Torey
Falco peregrinus	Lake Zun-Torey
Falco naumanni	Lake Zun-Torey
Grus japonensis	Lake Zun-Torey
Grus leucogeranus	Lake Zun-Torey
Grus vipio	Lake Zun-Torey
Grus monacha	Lake Zun-Torey
Anthropoides virgo	Lake Zun-Torey
Otis tarda	Lake Zun-Torey
Himantopus himantopus	Lake Zun-Torey
Recurvirostra avosetta	Lake Zun-Torey
Numenius madagascariensis	Lake Zun-Torey
Limnodromus semipalmatus	Lake Zun-Torey
Larus relictus	Lake Zun-Torey
Larus saundersi	Lake Zun-Torey
Hydroprogne caspia	Lake Zun-Torey
Bubo bubo	Lake Zun-Torey
Melanocorypha mongolica	Lake Zun-Torey
?egalurus pryeri	Lake Zun-Torey
Emberiza aureola	Lake Zun-Torey
Eremias argus	Lake Zun-Torey
Tripogon chinensis	Lake Zun-Torey
Asparagus brachyphyllus	Lake Zun-Torey
	Wyoming Saline Playas
	Wyoming Saline Playas
Charadrius nivosus	Lake Albert
	Lake Albert
	Great Salt Lake
	Great Salt Lake
Dermochelys coriacea	Lake Pontchartrain
Lepidochelys kempi	Lake Pontchartrain
Eretmochelys imbricata	Lake Pontchartrain
	Larnaca Salt Lake
	Limassol salt lake
Anatolichthys transgrediens	Lake Acigol
Cobitis phrygica	Lake Acigol
Otis tarda	Lake Acigol
Aphanius Anatoliae	Lake Acigol
Phoenicopterus chilensis	Laguna Epecuen
Phoenicopterus chilensis	La Salada (Pedro Luro)
Chirostoma bartoni	La Alberca
Skiffia bilineata	La Alberca
Alloophorus robustus	La Alberca
Chirostoma sp.	Lake Cuitzeo
Alloophorus robustus	Lake Cuitzeo
Skiffia bilineata	Lake Cuitzeo
Goodea atripinnis	Lake Cuitzeo
Pseudoeurycea belli	Lake Cuitzeo
Allotoca dugesii	Lake Cuitzeo
Ambystoma flavipiperatum	Lake Cuitzeo
Ambystoma amblycephalum	Lake Cuitzeo
Anthus spragueii	Lake Cuitzeo
Geothlypis speciosa	Lake Cuitzeo
Poblana alchichica	Lake Alchichica
Ambystoma taylori	Lake Alchichica
Girardinichthys viviparus	Texcoco
Geothlypis speciosa	Texcoco
Charadrius nivosus	Texcoco
Rallus tenuirostris	Texcoco
	Rincon de Parangueo
Totoaba macdonaldi	Salton Sea
Cynoscion othonopterus	Salton Sea
Oreochromis mossambicus	Salton Sea
Cyprinodon macularius	Salton Sea
Charadrius nivosus	Salton Sea
Rallus obsoletus	Salton Sea
Charadrius montanus	Salton Sea
Phoenicopterus chilensis	Laguna Chadilauquen
Phoenicopterus chilensis	Laguna El Carancho
Phoenicopterus chilensis	Laguna Este Parque Luro
Phoenicopterus chilensis	Laguna Utracan
Aquila Heliaca	Qinghai Lake
Haliaeetus leucoryphus	Qinghai Lake
Grus nigricollis	Qinghai Lake
Procapra przewalskii	Qinghai Lake
Cervus albirostris	Qinghai Lake
Grus nigricollis	Qarhan Salt Lake
