# Supplementary material for: The overlooked conservation value and ecosystem services of saline lakes
Source: Research Square preprint supplement (doi:10.21203/rs.3.rs-5835171/v1), 2025-02-24
Supplement: Supplementary file 3 [file b15d463c053e2495fb45c7f8.docx]

**Supplementary information**

**The overlooked conservation value and ecosystem services of saline lakes**

Egor Zadereev, Ramesh Wilson, Pavel Kratina, Ors Abram, Ekaterina Afonina, Javier Alcocer, María Belén Alfonso, Tania Anderson, Elena Anufriieva, Nurgül Balci, Luciana Gomes Barbosa, Bonnie K. Baxter, Balzhit Bazarova, Yuri Bazhenov, Michael Beckmann, Emil Boros, Svetlana Borzenko, Enrique H. Bucher, Antonio Camacho, Emilio O Casamayor, Xiaobo Chao, Peri Coleman, María Florencia Colla, Bindy Datson, Santiago Echaniz, Maria Eugenia Farias, Tadesse Fetahi, Larisa Golovatyuk, Peter Hudson, Katia Hueso-Kortekaas, Jill Johnston, Bakhtiyor Karimov, Irina Kalioujnaia, Mills Keely, Anastasia Komova, Lothar Krienitz, Seema Kulshreshtha, Ron Larson, Oksana Lipka, Evgeniya Matyugina, Quentin Mauvisseau, John Melack, Daniel Morant, Edmundo Moreno, Zorigto Namsaraev, Aharon Oren, Christopher Rogers, David Ryves, Marta I. Sánchez, Alba Camacho-Santamans, Anna C. Santamans, Michael Schagerl, Elena Selivanova, Nickolai Shadrin, Somayeh Sima, Natalya Tashlykova, Katrin Teubner, Gazhit Tsybekmitova, Brian Timms, Svetlana Ulanova, Nicolás E. Vidal Quini, Alicia Vignatti, Wayne A. Wurtsbaugh, Charitos Zapitis, Thomas Zechmeister, Can Zhang, Alfred Burian

**Table of content**S1: More specific discussion of management and monitoring standards in the EU
S2: Additional methodological descriptions
S3: The template of the questionnaire
S4: Additional tables and figures
S5: References

**S1: More specific discussion of management and monitoring standards in the EU**

In contrasts to freshwater systems, the level of management and monitoring standards for saline lakes largely diverge among EU member states. We provide here examples from two different countries (Austria and Spain) to provide critical reflections on potential improvements and strong points that can serve as model for other countries.

**(i) Austria**

Saline lakes in Austria are concentrated in the drier Eastern part of the country with a continental, temperate climate. A major step toward the sustainable management of these lakes is that Lake Neusiedl, the largest saline lakes is monitored under the Water Framework Directive of the EU (BGBl. II Nr. 99/2010) and a special monitoring program has been implemented for smaller saline pans. A further major achievement is that boundaries have been established that define a good ecological status of individual lakes and pans. Hence, the collected field data are used to evaluate the state of individual saline ecosystems in Austria.

Despite these acomplishments, several major challenges remain unaddressed. First, the monitoring of saline lakes fails to meet the advanced level that has been reached in the evaluation of freshwater systems. Monitoring of freshwater systems relies on both physio-chemical conditions as well as on biological status assessments. In saline lakes, however, monitoring includes primarily the evaluation of salinity and pH-values. Furthermore, target chlorophyll-*a* values have been defined. However, monitoring lacks the comprehensive evaluation of primary producers (macrophyte or phytoplankton) or invertebrates that is implemented for freshwater communities. Hence, the biological component of monitoring is still comparatively poor in saline lakes, persumabily also because there are no comprehensive regional bio-indicator indices that have been developed for this purpose.

Moreover, there are no saline-specific parameters included in current monitoring frameworks (BGBl. II Nr. 99/2010). For example, Wurtsbaughet al. (2017) have highlighted the fundamental importance of monitoring water balances in saline lakes. Hence, indicators such as catchment-wide water balances or other hydrological indicators are central to evaluate the status of saline lake systems. Their inclusion in ecological and environmental status assessments of saline water bodies would substantially strengthen their power an efficacy to support management.

An additional challenge is that there are no actionable management interventions that are universally agreed upon and that can rapidly be implemented in case of emergency. This situation is exemplified by the case of Lake Neusiedl. The lake has experienced massive alterations of its catchment over the course of the last four centuries (Tolotti et al. 2021). Currently, reductions in lake levels are a central issue of concern (Cotera et al. 2023, Soja et al. 2013, Hackl and Ledolter 2023). Proposed countermeasures include alterations in the management of an artificial channel that reduces maximum lake levels, redirection of new water sources to the lake or the artificial removal of sediments to increase the depth of the lake. However, these measures could induce strong trade-offs for the provisioning of different ecosystems services and could negatively affect either the conservation of the lake’s fauna and flora, the potential of agricultural production close to the lake or the regional tourism industry. A consequence of the resulting conflicting interests is that there are currently no clear actionable interventions that can be implemented in case of potential deterioration in the ecological status of the lake.

**(ii) Spain**

Spain is the European country with the highest number of saline ecosystems accounting for almost hundred inland salines lakes (Comin & Alonso, 1988; Martino, 1988; Alcorlo et al., 1996). Most of them are temporary (Doña et al., 2016, 2021), with summer annual drying, but some are naturally or artificially (Garcia-Ferrer et al., 2003) permanently flooded. Although their salinity fluctuates seasonally, some are typically mesosaline whereas others are permanently hypersaline (sensu Hammer, 1986). These athalassohaline lakes are mainly endorheic, and are distributed within several lakes districts. These main lake districts are located in the regions of Andalucia and Aragon (Guerrero & de Wit, 1992), as well as in Castilla - La Mancha (Ballesteros et al., 2018) and Castilla y Leon. Magnesium sulphate is the main salt in mesosaline lakes, whereas this dominance turns to sodium chloride in hypersaline lakes (De la Peña, 1987; Ordoñez et al., 1987; Camacho et al., 2003), although sodium bicarbonate prevails in soda lakes. These lakes have a very characteristic flora (Medina Domingo, 2022) and specific relicted fauna well-know from time ago (Margalef, 1947), and hence the region exemplifies the diversity of saline lakes.

Because of their environmental relevance, saline lakes have been considered in the development of the European Water Framework Directive (European Commision, 2000) by Spain. The classification of the lake type waterbodies in Spain uses system B, which includes environmental features such as conductivity, aridity index, hydroperiod, alkalinity, and others. These environmental parameters are used to distinguish among saline lakes and differentiate them from freshwaters systems. From a total of 30 lake types considered in the Spanish classification of “lake type” waterbodies, 4 correspond to inland saline lakes, two mesosaline (LT-20 permanent, and LT21 temporary) and two hypesaline (LT-22 permanent, and LT23 temporary). By considering them as waterbodies (official consideration as WFD targets for achieving their good ecological status), Type LT-20 includes 7 mesosaline permanent lakes, LT-21 26 mesosaline temporary lakes, LT-23 14 hypersaline temporary lakes and, finally, LT-22 includes the only permanent (relatively) deep (5.6 m) hypersaline lake in Western Europe, the Salada de Chiprana (Camacho and de Wit, 2003).

All these lakes have specific reference conditions and tresholds for the ecological quality ratio (EQR) for the same indicator variables used for the freshwater lakes in Spain: These include the same biological quality elements than freshwater lakes, namely phytoplankton, macrophytes (hydrophytes, helophytes and, further for saline lakes, halophytes) and benthic invertebrates, except fish, as the Spanish inland saline lakes are naturally fishless. Further, the assessment of their ecological status also includes the same physical, chemical (e.g. conductivity), and hydromorphological (e.g. hydroperiod length) variables than freshwater lakes. Thus, the requirements of achieving the good ecological status and its assessment system of Spanish saline lakes are equally stringent than any of the other lakes declared as waterbodies under the WFD. Consequently, it can be stated that in Spain, all saline lakes declared as lake waterbodies are, thus, equally considered as any other Spanish lake.

As including a complete set of variables in the assessment system, and tresholds related to the five quality classes of the WFD, the quality requirements of saline lakes are fully monitored and deviations from the good ecological status can be detected and, even more important, corrected with actions planned within the river basin management plans. As such, these plans have designed and implemented actions to reduce trophic alterations, one of the main pressures suffered by inland saline lakes, mainly caused by the former inputs of sewage or, more recently, treated wastewaters (Corrales-Gonzalez et al, 2019). Additional to an increased trophic status, these water inputs, together with agriculture run-off, cause drops of water salinity degradating the essential saline character of their waters, and determine changes in the natural hydroperiod that uncouple the natural biological cycles and the lake biogeochemistry. Moreover, abstraction from the aquifers have caused a drop in the natural groundwater feeding of some of these lakes, particularly in La Mancha, also changing lake´s natural hydrological patterns. So far, the river basin management plans, jointly with the nature conservation authorities, have designed a number of actions that permited the improvement of the ecological status of an important number of Spanish inland saline lakes. Hence, the approach used by Spain could be considered as an example on how systematic monitoring and consuldated actions can help to safeguard ecosystem services and natural biodiversity supported by saline lakes.

**S2: Additional methodological descriptions**

*Details on the creation of phylogenetic trees for subsequent analyses*

We checked the availability of COX1 sequences for all species from the list on endangered species using the NCBI database. When the species-specific sequences were available on NCBI, we retrieved their unique NCBI taxonomy ID and sequence information. When the species were not on NCBI, we identified a closely related sister species and used its unique NCBI taxonomy ID and sequence information. We ended up with a list of unique NCBI taxonomy ID, and using this list, we then used phyloT (https://phylot.biobyte.de/) to build a phylogenetic tree based on the NCBI taxonomy. We used the default parameters (automatic determination of direction; cost matrix = 51% similarity; gap open penalty = 12; gap extension penalty = 3) for a global alignment with free end gaps. Four species had to be removed from the phylogenetic analysis, either due to no available COI sequence for itself or a close relative, or because the sequence was seemingly incorrect or confounding during sequence alignment. Those species were *Triturus dobrogicus*, *Pelusios broadleyi, Chalcides bedriagai* and *Bitis worthingtoni* (see also Table S4.2). Finally, we visualized the phylogenetic tree using iTOL (https://itol.embl.de/).

**S3: The template of the questionnaire**

**General Information**

The general criterion for the lake to be included into the survey is average salinity above 0.5-1 g L-1 and size of the lake above 0.05 km2. For clarification, examples of answers are provided. Lines in bold are compulsory questions.

| **Lake name** | **e.g. Lake Shira** |
| --- | --- |
| **Country** | **e.g. Russia** |
| **Coordinates** | **e.g. 54°30′ N 90°12′ E** |
| **Lake Size** | **km2** |
| **Volume** | **m3** |
| **Maximal depth** | **m** |
| **Average depth** | **m** |
| **Salinity, average** | **g/l** |
| **Chemical type of the lake (based on dominating ions)** | **e.g. carbonate (soda), sodium sulfate, magnesium sulfate, chloride, etc.** |
| **Lake origin** | **e.g. terminal lake in endorheic basin, karst lake, coastal lake, crater lake, man-made pit lake, etc.** |
| **Observed fluctuations of salinity in past 50 years** | **Yes or No** |
| **Magnitude of recent (during last 50 years) salinity fluctuations** | **e.g. 2-25 g/l** |
| Desiccation event in last 50 years | Yes or No  If yes, number of events |

**Ecosystem characteristics**

| Maximal, minimal and typical Secchi depths during growing season | m |
| --- | --- |
| Mixing regime | e.g. shallow-mixed, monomictic, dimictic, polymictic, meromictic, etc. |
| Average and maximum summer (growing season) chlorophyll concentrations | mg/m2 |
| Dominant phytoplankton species | Latin names |
| Dominant zooplankton species | Latin names |
| **Fish presence** | **Yes or No** |
| Dominant fish species | Latin names |
| Estimate of total species richness  (at least for vertebrates and invertebrates over >1mm in body size. For smaller size organisms like nematodes, algae or bacteria we usually do not have a reliable count. However, if you have reliable estimates for smaller organisms, you can also provide them). | e.g. invertebrates - 20 species, vertebrates - 5 species, terrestrial vertebrate species depending on the lake (waterfowl, etc.) - 3 species |
| **Lake has associated wetland that directly dependent on the existence of the lake** | **Yes or No** |
| Approximate area of the wetland | km2 |

**Conservation Status**

| **Part of Ramsar Site** | **Yes or No**  **If Yes, name of Ramsar Site** |
| --- | --- |
| **Protected area (national or regional) status** | **Yes or No**  **If Yes, name status** |
| **Presence of endangered species according to national or international law (e.g. IUCN red list)** | **Yes or No** |
| List of endangered species (if applicable) | Latin names |
| Presence of Endemic Species | Yes or No |
| List of Endemic Species (if applicable) | Latin names |

**Ecosystem services status**

| **Lake water is used for economic purposes** | **Yes or No** |
| --- | --- |
| Type of water usage | e.g. agriculture, aquaculture, desalination, drinking purposes, etc. |
| Amount of water used (if available separate estimates for different uses) | for each purpose, m3 per year |

| **Water from the closed basin is withdrawn for economic purposes** | **Yes or No** |
| --- | --- |
| Type of water withdraw | e.g. agriculture, aquaculture, desalination, drinking purposes, etc. |
| Amount of water used (if available separate estimates for different uses) | for each purpose, m3 per year |

| **Lake or associated wetland is used for the discharge of wastewater** | **Yes or No** |
| --- | --- |
| Type of wastewater | e.g. industry, agriculture, cattle, domestic, etc. |
| **The wastewater is properly treated before discharge** | **Yes or No** |
| The amount of wastewater discharged (if available) (approximate values) | m3 per year or wastewater from which no of inhabitants |

| **Lake shore is populated** | **Yes or No** |
| --- | --- |
| Population of cities of villages located at the shore of the lake | number of people |

| **Lake is used for commercial fishery** | **Yes or No** |
| --- | --- |
| **Lake was stocked with non-native fish species** | **Yes or No** |
| Type of fishery | natural or aquaculture |
| Estimate of commercial fishery yield (if available) (approximate values) | tons per year |

| **Lake or associated wetlands are used to harvest other biological resources** | **Yes or No** |
| --- | --- |
| Type of resources | e.g. Artemia, Gammarus, algae biomass, higher plants biomass, etc. |
| Estimate of harvested yield of resources (if available) (approximate values) | tons per year |

| **Lakes is used for commercial extraction of salts, minerals or muds** | **Yes or No** |
| --- | --- |
| Type of extracted resource | e.g. salts, muds, etc. |
| Estimate of extracted resource (if available, if several minerals or resources – for each resource separate number) (approximate values) | tons per year |

| **Lakes is used as recreational site** | **Yes or No** |
| --- | --- |
| Type of recreation | e.g. camping, hotel, visit center, spa resort, etc. |
| Intensity of recreation | seasonally or regularly |
| Origin of tourists | local, regional or international |
| Estimate of number of visitors (if available) (approximate values) | people per year |
| Estimate of the average duration of the visit | days |

| **Lake is used as valuable science research object** | **Yes or No** |
| --- | --- |
| **There are at least 20 papers in Web of Science Core Collection searched with “Lake Name”** | **Yes or No** |
| The distance to the closest large educational or science institution (university, academic institute) | km  name of the university or institute |
| **The lake is used for teaching course and/or There is a research field station at the lake** | **Yes or No** |

| **Lake provides cultural ecosystem services** | **Yes or No** |
| --- | --- |
| Type of cultural ecosystem services | Select appropriate characteristics of the lake:  - resonant in terms of culture or heritage,  - enable aesthetic experiences,  - have symbolic meaning,  - have sacred or religious meaning,  - etc. |

| Other ecosystem services provided by the lake | Please add information on any other ecosystem service that is not covered by previous questions (e.g. major effect on local microclimate, development of biotechnological patents based native microbial taxa, etc.)    To be sure that you covered all important ecosystem services you can check International Classification of Ecosystem Services available here<https://cices.eu/content/uploads/sites/8/2018/03/Finalised-V5.1_18032018.xlsx> |
| --- | --- |

| **Please, select and rank the three most important ecosystem services of the lake, subjective judgment** | - **Provision of water**  - **Provision of biological resources**  - **Provision of mineral resources**  - **Regulation and maintenance of water quality and/or ecosystem health**  - **Regulation and maintenance of local weather/climate**  - **Recreational services**  - **Cultural services**  - **Educational/scientific services**  - **Others (please specify)** |
| --- | --- |

**Current and potential threats to the lake**

| **Does lake experience water withdrawal** | **Yes or No**  **If yes: withdrawn % of total runoff in the catchment** |
| --- | --- |
| **The climate change is expected to have a severe impact on the lake’s provision of ecosystem services** | **Yes or No** |
| **What are the main impacts of climate change on the lake** | **e.g. reduced runoff, increased evaporation, water temperature increase, effects of wind, increased climate variability, altered stratification patterns, etc.** |
| **There are invasive or introduced species in the lake** | **Yes or No** |
| What are the main land-uses in the catchment (if possible provide % of land cover)? | e.g. industry 5%, agriculture 70%, human settlements 10%, intact ecosystems 15%,  etc. |
| **Please, select and rank the three most important threats to the lake, subjective judgment** | **- land use change and intensity**  **- pollution**  **- climate change**  **- invasive species**  **- overexploitation (e.g. fisheries)**  **- water abstraction**  **- others (please specify)** |

**S4: Additional tables and figures**

**Table S4.1.** More detailed information on the saline lakes included in this study. Salinity fluctuations refers to magnitude of fluctuations within a reference period of 50 years. For other values, researchers were asked to provide information on average conditions within the last ten years. Lake type was categorised as 1 (continental saline), 2 (continental soda) and 3 (seawater derived).

| Lake | Continent | Lake area, km2 | Volume, km3 | Salinity g L-1 | Salinity fluctuations, g L-1 | Type of the lake1 |
| --- | --- | --- | --- | --- | --- | --- |
| Abert | N.America | 170.00 | 6.0000 | 100.00 | 20 - 250 | 2 |
| Abijata | Africa | 150.00 | 3.8000 | 26.40 | 8 - 27 | 2 |
| Acıgöl | Eurasia | 45.00 | 0.0540 | 45.00 | 10 - 25 | 1 |
| Alcahozo | Eurasia | 0.77 | 0.0002 | 60.79 | 27 - 114 | 1 |
| Alchichica | N.America | 2.37 | 0.1147 | 10.00 | 8 - 10 | 2 |
| Aydar-Arnasay | Eurasia | 3478.00 | 38.5000 | 4.75 | 1 - 10 | 1 |
| Bain-Tsagan | Eurasia | 4.00 | 0.0230 | 4.00 | 2 - 25 | 2 |
| Balkhash | Eurasia | 20300.00 | 124.8000 | 4.00 | 1 - 6 | 1 |
| Baskunchak | Eurasia | 106.00 | 0.1575 | 335.00 | 300 - 370 | 3 |
| Bogoria | Africa | 38.00 | 0.2470 | 27.00 | 24 - 50 | 2 |
| Carey | Australia | 750.00 | 0.3750 | 123.60 | 7 - 240 | 3 |
| Chadilauquen | S.America | 8.90 | 0.0151 | 24.00 | 14.0-40.0 | 1 |
| Corangamite | Australia | 13.96 | 1.5090 | 165.00 | 65 - 180 | 3 |
| Cuitzeo | N.America | 306.00 | 0.9200 | 5.30 | ND2 | 2 |
| Dead Sea | Eurasia | 600.00 | 118.0000 | 350.00 | 240 - 350 | 1 |
| Diamante | S.America | 19.00 | 0.0038 | 171.90 | 74 - 270 | 2 |
| Doroninskoe | Eurasia | 4.50 | 0.0150 | 28.00 | 8 - 92 | 2 |
| Dunino | Eurasia | 0.09 | 0.0002 | 167.30 | 12 - 300 | 3 |
| El Carancho | S.America | 0.90 | 0.0008 | 18.50 | 5.7-39.5 | 2 |
| Elementeita | Africa | 20.00 | 0.0650 | 11.00 | 0.5 - 35 | 2 |
| Elton | Eurasia | 152.00 | 0.0240 | 375.00 | 113 - 525 | 1 |
| Epecuen | S.America | 151.00 | 1.2382 | 0.17 | ND | 2 |
| Este Parque Luro | S.America | 1.32 | 0.0008 | 276.00 | 40 - 317 | 1 |
| Eyre | Australia | 9690.00 | 30.1000 | 96.00 | 3 - 250 | 3 |
| Fuente de Piedra lake | Eurasia | 13.64 | 0.0050 | 41.20 | 10 - 400 | 1 |
| Gairdner | Australia | 4300.00 | 0.8600 | 210.00 | NA | 3 |
| Gallocanta | Eurasia | 14.40 | 0.0058 | 60.00 | 32 - 105 | 1 |
| George | Australia | 154.00 | 0.5000 | 19.00 | 2 - 36 | 3 |
| Gidgee | Australia | 2.20 | 0.0020 | 90.00 | 3 - 180 | 3 |
| Grande | S.America | 3.12 | 0.0002 | 9.80 | 5 - 15 | 1 |
| Great Salt Lake  South arm  North arm | N.America | 4137.00 | 18.5000 | 134.00  296.00 | 48 - 295  167 - 362 | 1 |
| Kamfers Dam | Africa | 4.00 | 0.0019 | 60.00 | 3 - 153 | 1 |
| Kanibarazan Wetland | Eurasia | 9.27 | 0.0140 | 1.50 | 0.9 – 2.4 | 3 |
| Katwe | Africa | 2.50 | 0.0025 | 150.00 | ND | 1 |
| Kelemen-szék | Eurasia | 1.90 | 0.0003 | 7.25 | ND | 2 |
| Khukh-Nur | Eurasia | 51.60 | 0.3040 | 6.86 | 4 - 9 | 2 |
| Kikorongo | Africa | 0.96 | 0.0022 | 23.15 | 1 - 30 | 2 |
| Kisezers | Eurasia | 17.30 | 0.0417 | 1.00 | 0.2 - 8 | 1 |
| Koyashskoye | Eurasia | 5.10 | 0.0025 | 240.00 | 210 - 270 | 3 |
| Krasnovishnevoye | Eurasia | 20.00 | 0.0030 | 300.00 | ND | 1 |
| La Alberca | N.America | 0.18 | 0.0091 | 4.00 | 1 - 6 | 2 |
| La Salada | S.America | 4.00 | 0.0100 | 30.40 | 21 - 52 | 2 |
| Larnaca | Eurasia | 4.49 | 0.0011 | 200.00 | 95 - 350 | 3 |
| Liepaja | Eurasia | 37.15 | 0.0743 | 1.30 | 0.2 - 7.5 | 1 |
| Limassol | Eurasia | 9.40 | 0.0025 | 65.00 | 5 - 100 | 3 |
| los Tollos | Eurasia | 1.10 | 0.0007 | 39.90 | 22 - 54 | 1 |
| Malinovoe | Eurasia | 11.00 | 0.0055 | 250.00 | 90 - 400 | 1 |
| Manjavacas | Eurasia | 2.59 | 0.0011 | 50.33 | 18 - 97 | 1 |
| Mar Chiquita | S.America | 3250.00 | 13.0000 | 50.00 | 28 - 270 | 1 |
| Mar Menor | Eurasia | 140.00 | 0.5800 | 44.50 | 36 - 53 | 3 |
| Marfovskoye | Eurasia | 2.39 | 0.0007 | 320.00 | 95 - 450 | 1 |
| Mono Lake | N.America | 160.00 | 2.7200 | 80.00 | 50 - 100 | 2 |
| Nakuru | Africa | 60.00 | 0.1800 | 5.30 | 0.5 - 62 | 2 |
| Neusiedl | Eurasia | 180.00 | 0.2412 | 1.30 | 0.6 - 2.4 | 1 |
| Nozhiy | Eurasia | 15.00 | 0.0375 | 1.30 | 0.5 - 5 | 2 |
| Oloidien | Africa | 4.50 | 0.0126 | 2.50 | 1 - 6 | 2 |
| Pape | Eurasia | 12.05 | 0.0060 | 1.00 | 0.2 - 5 | 2 |
| Playa | Eurasia | 2.40 | 0.2400 | 87.50 | 20 - 160 | 1 |
| Pontchartrain | N.America | 1630.00 | 6.0000 | 3.50 | 0 - 3.5 | 3 |
| Qarhan | Eurasia | 5856.00 | 2.9280 | 341.00 | ND | 1 |
| Qinghai | Eurasia | 4626.00 | 72.0000 | 16.00 | 12 - 16 | 1 |
| Queimadas | S.America | 0.20 | 0.0002 | 1.80 | 1 - 3 | 1 |
| Razval | Eurasia | 0.07 | 0.0004 | 300.00 | 157 - 350 | 3 |
| Rincón de Parangueo | N.America | 0.72 | 0.0362 | 120.00 | 17 - 120 | 2 |
| Sakskoye | Eurasia | 9.70 | 0.0058 | 160.00 | 25 - 50 | 3 |
| Salada de Chiprana | Eurasia | 1.55 | 0.0004 | 63.00 | 30 - 90 | 1 |
| Salton Sea | N.America | 970.00 | 7.4000 | 45.00 | 33 - 45 | 1 |
| Sambhar Salt Lake | Eurasia | 190.00 | 227.3200 | 74.00 | 12 - 300 | 1 |
| Sarpa | Eurasia | 1.70 | 0.0009 | 85.00 | 4 - 100 | 1 |
| Sasyk-Sivash | Eurasia | 75.30 | 0.0377 | 275.00 | 25 - 40 | 3 |
| Seagull | Australia | 0.61 | 0.0003 | 137.50 | 75 - 200 | 3 |
| Seewinkel Soda pans | Eurasia | 4.70 | 0.0010 | 3.70 | 1 - 27 | 2 |
| Shala | Africa | 329.00 | 37.0000 | 18.60 | ND | 2 |
| Shira | Eurasia | 36.00 | 0.3850 | 16.00 | 15 - 27 | 1 |
| Slano Kopovo | Eurasia | 1.19 | 0.0002 | 2.60 | ND | 2 |
| Texcoco | N.America | 10.00 | 0.0100 | 85.00 | ND | 2 |
| Titicaca | S.America | 8100.00 | 850.0000 | 5.00 | ND | 2 |
| Torey lakes  Barun-Torey  Zun-Torey | Eurasia | 580.00  193.00 | 0.1000  1.0600 | 3.00  5.00 | 1 - 6  1 - 18 | 2 |
| Torrens | Australia | 5923.00 | 3.0000 | 90.00 | 13 - 250 | 1 |
| Urmia | Eurasia | 4151.00 | 15.3000 | 275.00 | 150 - 400 | 1 |
| Utracán | S.America | 0.97 | 0.0009 | 125.00 | 28 - 424 | 1 |
| Wyara | Australia | 34.00 | 0.0680 | 160.00 | 1 - 330 | 1 |
| Wyoming Saline Playas | N.America | 4.00 | 0.0000 | 50.00 | 20 - 80 | 1 |

1 There is no uniform classification of saline lakes. First, there is a division between thalassic water bodies (such as lagoons or separated lakes) which have connection to the sea either through surface or groundwaters, and athallassic lakes that are continental lakes located in hydrologically closed basins. Athallassic lakes can be divided based on salt content (e.g., subsaline, hyposaline, hypersaline), chemical composition (e.g., carbonate, sulphate and chloride), permanent status (e.g. permanent or ephemeral), origin (e.g. karst lakes, tectonic lakes), etc. As all these classifications are not uniform and straightforward we kept it as simple as possible and partially followed recently developed IUCN ecosystem typology (<https://global-ecosystems.org/>). For athallassic lakes that are classified by IUCN as "F2.6 Permanent salt and soda lakes" or "F2.7 Ephemeral salt lakes" we used notions "1 – continental saline lakes" and "2 – continental soda lakes". For thalassic water bodies which are "FM1.3 Intermittently closed and open lakes and lagoons" according to IUCN typology we used the notion "3 - seawater lakes".

2ND - No data

**Table S4.2.** Findings from endangered species exploration, with additional information on rejected species and sequence replacements. The notes section details the sequence of the nearest relative used when necessary, as the ‘true’ species sequence was either unattainable, or seemingly confounding or incorrect during sequence alignment and phylogeny construction. Species in red were unable to be used in the tree construction, as they did not have a sequence, nor any close relatives. Note, the IUCN status shorthand: NT = near threatened; VU = vulnerable; EN = endangered; CR = critically endangered; RE = regionally extinct.

Details on the creation of phylogenetic trees for subsequent analyses: A global alignment with free end gaps was conducted. The default settings on the user interface were used as evolutionary inferences were not the goal. The default parameters were as follows: automatic determination of direction; cost matrix = 51% similarity; gap open penalty = 12; gap extension penalty = 3. Four species had to be removed from the phylogenetic analysis, either due to no available COI sequence for itself or a close relative, or because the sequence was seemingly incorrect or confounding during sequence alignment.

| **Latin name** | **Common name** | **Frequency mentioned in surveys** | **Group** | **Continent(s) holding endangered status** | **IUCN status** | **Notes** |
| --- | --- | --- | --- | --- | --- | --- |
| *Acipenser nudiventris* | Ship sturgeon | 1 | Fish | Europe, Asia | CR |  |
| *Alburnus albidus* | Italian bleak | 1 | Fish | Europe | VU |  |
| *Alcolapia alcalica* | Common natron tilapia | 1 | Fish | Africa | EN | Used relative: *Oreochromis niloticus* |
| *Alloophorus robustus* | Bulldog goodeid | 2 | Fish | North America | VU |  |
| *Anatolichthys anatoliae* | Anatolian giant killifish | 1 | Fish | Europe | NT |  |
| *Anatolichthys transgrediens* | Acipinar killifish | 1 | Fish | Europe | CR |  |
| *Anguilla anguilla* | European eel | 4 | Fish | Europe | CR |  |
| *Aphanius iberus* | Spanish toothcarp | 3 | Fish | Europe | EN |  |
| *Brycinus ferox* | Large-toothed Lake Turkana robber | 1 | Fish | Africa | VU | Used relative: *Brycinus nurse* |
| *Brycinus minutes* | *Brycinus minutes* | 1 | Fish | Africa | VU | Used relative: *Brycinus imberi* |
| *Capoetobrama kuschakewitschi* | Sharpray | 1 | Fish | Asia | EN | Used relative: *Acanthobrama persidis* |
| *Chirostoma bartoni* | Alberca silverside | 1 | Fish | North America | CR |  |
| *Chrysichthys turkana* | *Chrysichthys turkana* | 1 | Fish | Africa | VU | Used relative: *Chrysichthys auratus* |
| *Cobitis phrygica* | *Aci spined loach* | 1 | Fish | Europe | EN |  |
| *Coregonus lavaretus* | European whitefish | 1 | Fish | Europe | CR |  |
| *Cynoscion othonopterus* | Gulf weakfish | 1 | Fish | North America | VU |  |
| *Cyprinodon macularius* | Desert pupfish | 1 | Fish | North America | VU |  |
| *Cyprinus carpio* | Common carp | 7 | Fish | Europe, Asia | EN |  |
| *Dicentrarchus labrax* | European seabass | 1 | Fish | Europe, Asia, Africa | NT |  |
| *Enteromius turkanae* | Lake Turkana barb | 1 | Fish | Africa | VU | Used relative: *Enteromius jae* |
| *Girardinichthys viviparus* | Chapultepec splitfin | 1 | Fish | North America | EN |  |
| *Haplochromis macconneli* | McConnell's haplo | 1 | Fish | Africa | VU | Used relative: *Haplochromis nubilus* |
| *Haplochromis rudolfianus* | Rudolf haplo | 1 | Fish | Africa | VU | Used relative: *Haplochromis polli* |
| *Haplochromis turkanae* | Turkana haplo | 1 | Fish | Africa | VU | Used relative: *Haplochromis burtoni* |
| *Hemichromis exsul* | Turkana jewel cichlid | 1 | Fish | Africa | VU | Used relative: *Hemichromis stellifer* |
| *Hippocampus guttulatus* | Long-snouted seahorse | 1 | Fish | Europe, Asia, Africa | NT |  |
| *Lacustricola jeanneli* | Omo lampeye | 1 | Fish | Africa | VU | Used relative: *Lacustricola lualabaensis* |
| *Lates longispinis* | Turkana perch | 1 | Fish | Africa | VU | Used relative: *Lates calcarifer* |
| *Micropanchax rudolfianus* | Lake Rudolf lampeye | 1 | Fish | Africa | VU | Used relative: *Micropanchax kingii* |
| *Neobola stellae* | Lake Turkana minnow | 1 | Fish | Africa | VU | Used relative: *Neobola bottegoi* |
| *Oreochromis mossambicus* | Mozambique tilapia | 1 | Fish | North America | VU |  |
| *Poblana alchichica* | Alchichica silverside | 1 | Fish | North America | CR |  |
| *Pomatomus saltatrix* | Bluefish | 1 | Fish | Europe, Asia, Africa, North America, South America, Oceania | VU |  |
| *Salmo salar* | Atlantic salmon | 1 | Fish | Europe, North America | VU |  |
| *Sardina pilchardus* | European pilchard | 1 | Fish | Europe | NT |  |
| *Schizothorax argentatus* | Balkhash marinka | 1 | Fish | Asia | VU |  |
| *Skiffia bilineata* | Twoline skiffia | 1 | Fish | North America | EN |  |
| [*Totoaba*](http://researcharchive.calacademy.org/research/ichthyology/catalog/fishcatget.asp?genid=7934) *macdonaldi* | Totoaba | 1 | Fish | North America | VU |  |
| *Umbra krameri* | European mudminnow | 2 | Fish | Europe | VU |  |
| *Acrocephalus paludicola* | Aquatic warbler | 2 | Bird | Europe, Africa | VU |  |
| *Aegypius monachus* | Cinereous vulture | 4 | Bird | Europe, Asia | NT |  |
| *Alcedo atthis* | Common kingfisher | 3 | Bird | Europe | VU |  |
| *Anas bahamensis* | White-cheeked pintail | 2 | Bird | South America | CR |  |
| *Anas falcata* | Falcated duck | 1 | Bird | Asia | NT |  |
| *Anhinga rufa* | African darter | 1 | Bird | Europe | RE | Used sister: *Anhinga anhinga* |
| *Anser cygnoides* | Swan goose | 3 | Bird | Asia | VU |  |
| *Anser erythropus* | Lesser white-fronted goose | 8 | Bird | Europe, Asia | VU |  |
| *Aquila clanga* | Greater spotted eagle | 5 | Bird | Europe, Asia, Africa | VU |  |
| *Aquila heliaca* | Eastern imperial eagle | 9 | Bird | Europe, Asia, Africa | VU |  |
| *Aquila rapax* | Tawny eagle | 4 | Bird | Africa, Asia | VU |  |
| *Ardeola idae* | Madagascar pond-heron | 1 | Bird | Africa | EN | Used close relative: *Ardeola ralloides* |
| *Aythya baeri* | Baer's pochard | 3 | Bird | Europe, Asia | CR | Used sister: *Aythya marila* |
| *Aythya ferina* | Common pochard | 2 | Bird | Europe, Asia, Africa | VU |  |
| *Aythya nyroca* | Ferruginous duck | 10 | Bird | Europe, Asia, Africa | NT |  |
| *Botaurus poiciloptilus* | Australasian bittern | 1 | Bird | Oceania | EN |  |
| *Branta ruficollis* | Red-breasted goose | 10 | Bird | Europe, Asia | VU | Used sister: *Branta bernicla* |
| *Calidris canutus* | Red knot | 1 | Bird | Europe, Asia, Africa, North America, South America, Oceania | NT |  |
| *Calidris ferruginea* | Curlew sandpiper | 4 | Bird | Europe | VU |  |
| *Calidris ruficollis* | Red-necked stint | 1 | Bird | Asia, Oceania, North America | NT |  |
| *Calidris tenuirostris* | Great knot | 1 | Bird | Europe, Asia, North America, Oceania | EN |  |
| *Ceryle rudis* | Pied kingfisher | 1 | Bird | Europe | EN | Used close relative: *Chloroceryle americana* |
| *Charadrius montanus* | Mountain plover | 1 | Bird | North America | NT |  |
| *Charadrius pallidus* | Chestnut-banded plover | 1 | Bird | Africa | NT |  |
| *Charadrius nivosus* | Snowy plover | 1 | Bird | North America | NT |  |
| *Chersophilus duponti* | Dupont's lark | 1 | Bird | Europe, Africa | VU | Used close relative: *Agelaius phoeniceus* |
| *Chettusia gregaria* | Sociable lapwing | 1 | Bird | Europe, Asia | CR | Used relative: *Vanellus chilensis* |
| *Chlamydotis undulata* | African houbara | 1 | Bird | Africa | VU |  |
| *Circus cyaneus* | Hen harrier | 4 | Bird | Europe | NT |  |
| *Circus macrourus* | Pallid harrier | 5 | Bird | Europe, Asia, Africa | NT |  |
| *Columba eversmanni* | Yellow-eyed pigeon | 1 | Bird | Asia | VU | Used sister: *Columba oenas* |
| *Coracias garrulus* | Roller | 1 | Bird | Europe | NT |  |
| *Cygnus columbianus* | Tundra swan | 5 | Bird | Europe, Asia, Africa, North America | EN |  |
| *Emberiza aureola* | Yellow-breasted bunting | 5 | Bird | Europe | CR |  |
| *Falco cherrug* | Saker falcon | 6 | Bird | Europe, Asia, Africa | EN |  |
| *Falco hypoleucos* | Grey falcon | 1 | Bird | Oceania | VU | Used close relative: *Falco novaeseelandiae* |
| *Falco naumanni* | Lesser Kestrel | 1 | Bird | Europe | VU |  |
| *Falco vespertinus* | Red-footed falcon | 2 | Bird | Europe, Asia, Africa | NT |  |
| *Ficedula semitorquata* | Semi-collard Flycatcher | 1 | Bird | Europe | NT |  |
| *Fulica atra* | Common coot | 2 | Bird | Europe | NT |  |
| *Fulica cornuta* | Horned coot | 3 | Bird | South America | NT |  |
| *Fulica cristata* | Red-knobbed coot | 3 | Bird | Europe | EN | Used sister: *Fulica americana* |
| *Gallinago media* | Great snipe | 3 | Bird | Europe, Asia, Africa | NT |  |
| *Glareola nordmanni* | Black-winged pratincole | 2 | Bird | Europe | VU |  |
| *Grus japonensis* | Red-crowned crane | 4 | Bird | Asia | EN |  |
| *Grus leucogeranus* | Siberian crane | 4 | Bird | Europe, Asia | CR |  |
| *Grus monacha* | Hooded crane | 4 | Bird | Asia | VU |  |
| *Grus nigricollis* | Black-necked crane | 1 | Bird | Asia | NT |  |
| *Grus vipio* | White-naped crane | 4 | Bird | Asia | VU |  |
| *Gyps africanus* | White-backed vulture | 1 | Bird | Africa | CR |  |
| *Gyps rueppelli* | Rüppell's vulture | 1 | Bird | Europe, Africa | CR | Used sister: *Gyps fulvus* |
| *Haematopus ostralegus* | Eurasian oystercatcher | 1 | Bird | Europe, Asia, Africa | NT |  |
| *Haliaeetus leucoryphus* | Pallas's fish-eagle | 2 | Bird | Europe, Asia | EN | Used sister: *Haliaeetus albicilla* |
| *Lanius meridionalis* | Iberian grey shrike | 1 | Bird | Europe | VU |  |
| *Larus audouinii* | Audouin's gull | 2 | Bird | Europe, Asia, Africa | VU |  |
| *Larus audouinii* | Audouin's Gull | 1 | Bird | Europe | NT |  |
| *Larus minutus* | Little gull | 4 | Bird | Europe | NT |  |
| *Larus relictus* | Relict gull | 4 | Bird | Europe, Asia | VU |  |
| *Larus saundersi* | Saunders's gull | 3 | Bird | Asia | VU | Used relative: *Larus canus* |
| *Limnodromus semipalmatus* | Asian dowitcher | 5 | Bird | Asia | NT |  |
| *Limosa lapponica* | Bar-tailed godwit | 4 | Bird | Europe, Asia, Africa, North America, Oceania | NT |  |
| *Limosa limosa* | Black-tailed godwit | 10 | Bird | Europe | VU |  |
| *Marmaronetta angustirostris* | Marbled duck | 8 | Bird | Africa, Asia | VU |  |
| *Milvus milvus* | Red kite | 1 | Bird | Europe | NT |  |
| *Necrosyrtes monachus* | Hooded vulture | 1 | Bird | Africa | CR |  |
| *Neophron percnopterus* | Egyptian Vulture | 1 | Bird | Europe | EN |  |
| *Numenius arquata* | Eurasian curlew | 13 | Bird | Europe, Asia | VU |  |
| *Numenius madagascariensis* | Far eastern curlew | 3 | Bird | Europe, Asia | EN |  |
| *Oceanodroma leucorhoa* | Leach's storm-petrel | 1 | Bird | Europe, Asia, Africa, North America, South America | VU |  |
| *Otis tarda* | Great bustard | 10 | Bird | Europe, Asia | VU |  |
| *Oxyura leucocephala* | White-headed duck | 7 | Bird | Europe, Asia, Africa | EN | Used sister: *Oxyura jamaicensis* |
| *Pelecanus crispus* | Dalmatian pelican | 3 | Bird | Europe, Asia, Africa | NT |  |
| *Phoenicoparrus jamesi* | James's flamingo | 2 | Bird | South America | NT |  |
| *Phoenicopterus andinus* | Andean flamingo | 2 | Bird | South America | VU |  |
| *Phoenicopterus chilensis* | Chilean flamingo | 7 | Bird | South America | NT |  |
| *Phoeniconaias minor* | Lesser flamingo | 8 | Bird | Africa, Asia | NT |  |
| *Podiceps auritus* | Horned grebe | 3 | Bird | Europe, Asia, North America | VU |  |
| *Polemaetus bellicosus* | Martial eagle | 1 | Bird | Africa | EN | Used closest relative: *Lophotriorchis kienerii* |
| *Polysticta stelleri* | Steller's eider | 1 | Bird | Europe, Asia, North America | VU |  |
| *Prionops poliolophus* | Grey-crested helmetshrike | 2 | Bird | Africa | NT | Used sister: *Prionops plumatus* |
| *Pterocles orientalis* | Black-bellied sandgrouse | 3 | Bird | Europe, Asia, Africa | EN |  |
| *Puffinus yelkouan* | Yelkouan Shearwater | 1 | Bird | Europe | NT |  |
| *Rallus obsoletus* | Ridgway's rail | 1 | Bird | North America | NT |  |
| *Rollandia microptera* | Titicaca grebe | 1 | Bird | South America | EN | Used sister: *Rollandia rolland* |
| *Rynchops flavirostris* | African skimmer | 1 | Bird | Africa | NT | Used sister: *Rynchops niger* |
| *Sternula nereis* | Fairy tern | 1 | Bird | Oceania | VU |  |
| *Streptopelia turtur* | European turtle-dove | 1 | Bird | Europe, Asia, Africa | VU |  |
| *Sylvia undata* | Dartford warbler | 2 | Bird | Europe, Africa | NT |  |
| *Tetrax tetrax* | Little bustard | 2 | Bird | Europe | VU |  |
| *Thinornis rubricollis* | Hooded plover | 1 | Bird | Oceania | VU |  |
| *Trigonoceps occipitalis* | White-headed vulture | 1 | Bird | Africa | CR |  |
| *Tringa brevipes* | Grey-tailed tattler | 1 | Bird | Asia, Oceania | NT |  |
|  |  |  |  |  |  |  |
| *Vanellus gregarious* | Sociable Plover | 1 | Bird | Europe | CR |  |
| *Vanellus vanellus* | Northern lapwing | 4 | Bird | Europe, Asia, Africa, North America, South America, Oceania | NT |  |
| *Xanthomyza phrygia* | Regent honeyeater | 1 | Bird | Oceania | CR | Used sister: *Anthochaera carunculata* |
| *Acinonyx jubatus* | Cheetah | 3 | Mammal | Africa, Asia | VU |  |
| *Allactaga major* | Great jerboa | 1 | Mammal | Asia | NT |  |
| *Ceratotherium simum* | White rhino | 1 | Mammal | Africa | NT |  |
| *Cervus albirostris* | Thorold's deer | 1 | Mammal | Asia | VU |  |
| *Chinchilla chinchilla* | Short-tailed chinchilla | 2 | Mammal | South America | EN | Used sister: *Chinchilla lanigera* |
| *Cricetus cricetus* | Common hamster | 2 | Mammal | Europe, Asia | CR |  |
| *Dama mesopotamica* | Persian fallow deer | 1 | Mammal | Asia | EN |  |
| *Damaliscus lunatus jimela* | Topi | 1 | Mammal | Africa | VU |  |
| *Diceros bicornis* | Black rhino | 1 | Mammal | Africa | CR |  |
| *Equus grevyi* | Imperial zebra | 1 | Mammal | Africa | VU |  |
| *Gazella subgutturosa* | Goitered gazelle | 2 | Mammal | Asia | VU |  |
| *Giraffa camelopardalis* | Giraffe | 3 | Mammal | Africa | VU |  |
| *Hippopotamus amphibius* | Hippopotamus | 3 | Mammal | Africa | VU |  |
| *Leopardus jacobita* | Andean cat | 2 | Mammal | South America | EN | Used relative: *Leopardus wiedii* |
| *Lutra lutra* | Eurasian otter | 2 | Mammal | Europe, Asia, Africa | NT |  |
| *Marmota sibirica* | Mongolian Marmot | 3 | Mammal | Asia | EN |  |
| *Miniopterus schreibersii* | Schreiber's bent-winged bat | 3 | Mammal | Europe, Asia, Africa | VU |  |
| *Myotis blythii* | Lesser mouse-eared bat | 1 | Mammal | Europe, Asia | NT |  |
| *Myotis capaccinii* | Long-fingered bat | 2 | Mammal | Europe, Asia, Africa | VU |  |
| *Oryx beisa* | East African oryx | 1 | Mammal | Africa | VU |  |
| *Ovis gmelini* | Mouflon | 1 | Mammal | Asia | NT | Used sister: *Ovis dalli* |
| *Panthera leo* | Lion | 1 | Mammal | Africa | VU |  |
| *Panthera pardus* | Leopard | 3 | Mammal | Africa, Asia | VU |  |
| *Procapra przewalskii* | Przewalski's gazelle | 1 | Mammal | Asia | EN |  |
| *Rhinolophus euryale* | Mediterranean horseshoe bat | 2 | Mammal | Europe, Asia | VU |  |
| *Rhinolophus ferrumequinum* | Greater horseshoe bat | 3 | Mammal | Europe, Asia | NT |  |
| *Rhinolophus hipposideros* | Lesser horseshoe bat | 1 | Mammal | Europe, Asia | NT |  |
| *Saiga tatarica* | Saiga | 1 | Mammal | Europe, Asia | CR |  |
| *Spermophilus citellus* | European souslik | 3 | Mammal | Europe | EN |  |
| *Vormela peregusna* | Marbled polecat | 1 | Mammal | Europe, Asia | VU | Used relative: *Galictis vittata* |
| *Bitis worthingtoni* | Kenya horned viper | 1 | Reptile | Africa | VU | **This species (as well as all other species in the genus) never aligned within the reptiles, and would throw off all other species also** |
| *Chalcides bedriagai* | Bedriaga's skink | 2 | Reptile | Europe | NT | **This species (as well as all other species in the genus) never aligned within the reptiles, and would throw off all other species also** |
| *Delma impar* | Striped legless lizard | 1 | Reptile | Oceania | EN | Used close relative: *Aprasia parapulchella* |
| *Pelusios broadleyi* | Turkana mud turtle | 1 | Reptile | Africa | VU | **This species (as well as all other species in the genus) never aligned within the reptiles, and would throw off all other species also** |
| *Timon lepidus* | Ocellated lizard | 1 | Reptile | Europe | NT |  |
| *Dolomedes plantarius* | Great raft spider | 1 | Arachnid | Europe | VU |  |
| *Ambystoma taylori* | Taylor's salamander | 1 | Amphibian | North America | CR |  |
| *Litoria aurea* | Green and golden bell frog | 2 | Amphibian | Oceania | VU |  |
| *Telmatobius culeus* | Titicaca water frog | 1 | Amphibian | South America | EN | Used relative: *Telmatobius vellardi* |
| *Triturus dobrogicus* | Danube crested newt | 2 | Amphibian | Europe | NT | **This species (as well as all other species in the genus) never aligned within the amphibians, and would throw off all other species also** |
| *Dytiscus latissimus* | *Dytiscus latissimus* | 2 | Insect | Europe | VU | Used relative: *Dytiscus marginalis* |
| *Lestes macrostigma* | Sark spreadwing | 1 | Insect | Europe | VU |  |
| *Phengaris nausithous* | Dusky large blue | 1 | Insect | Europe | NT |  |
| *Phengaris teleius* | Scarce large blue | 1 | Insect | Europe | VU |  |
| *Saga pedo* | Common predatory bush-cricket | 2 | Insect | Europe, Asia | VU |  |
| *Astacus astacus* | Noble crayfish | 1 | Crustacean | Europe, Africa | VU |  |
| *Branchinella simplex* | *Branchinella simplex* | 1 | Crustacean | Australia | VU | Used sister: *Branchinella pinnata* |
| *Anodonta cygnea* | Swan mussel | 1 | Mollusc | Europe | NT |  |

**Table S4.3.** Most important threats for saline lakes and most important impacts of climate change highlighted by saline lake researchers.

| **Most important threats** | | **Count** |
| --- | --- | --- |
| Climate change | | 52 |
| Land-use change | | 46 |
| Natural resource use and exploitation, including:  - Water abstraction  - Overexploitation  - Mining | | 42  27  6  9 |
| Pollution | | 26 |
| Invasive species | | 6 |
| Others | | 12 |
|  | |  |
| **Most important impacts of climate change** | **Count** | |
| Increased evaporation | | 54 |
| Reduced water inflow | | 35 |
| Higher water temperature | | 35 |
| Increased variability | | 25 |
| Others | | 63 |


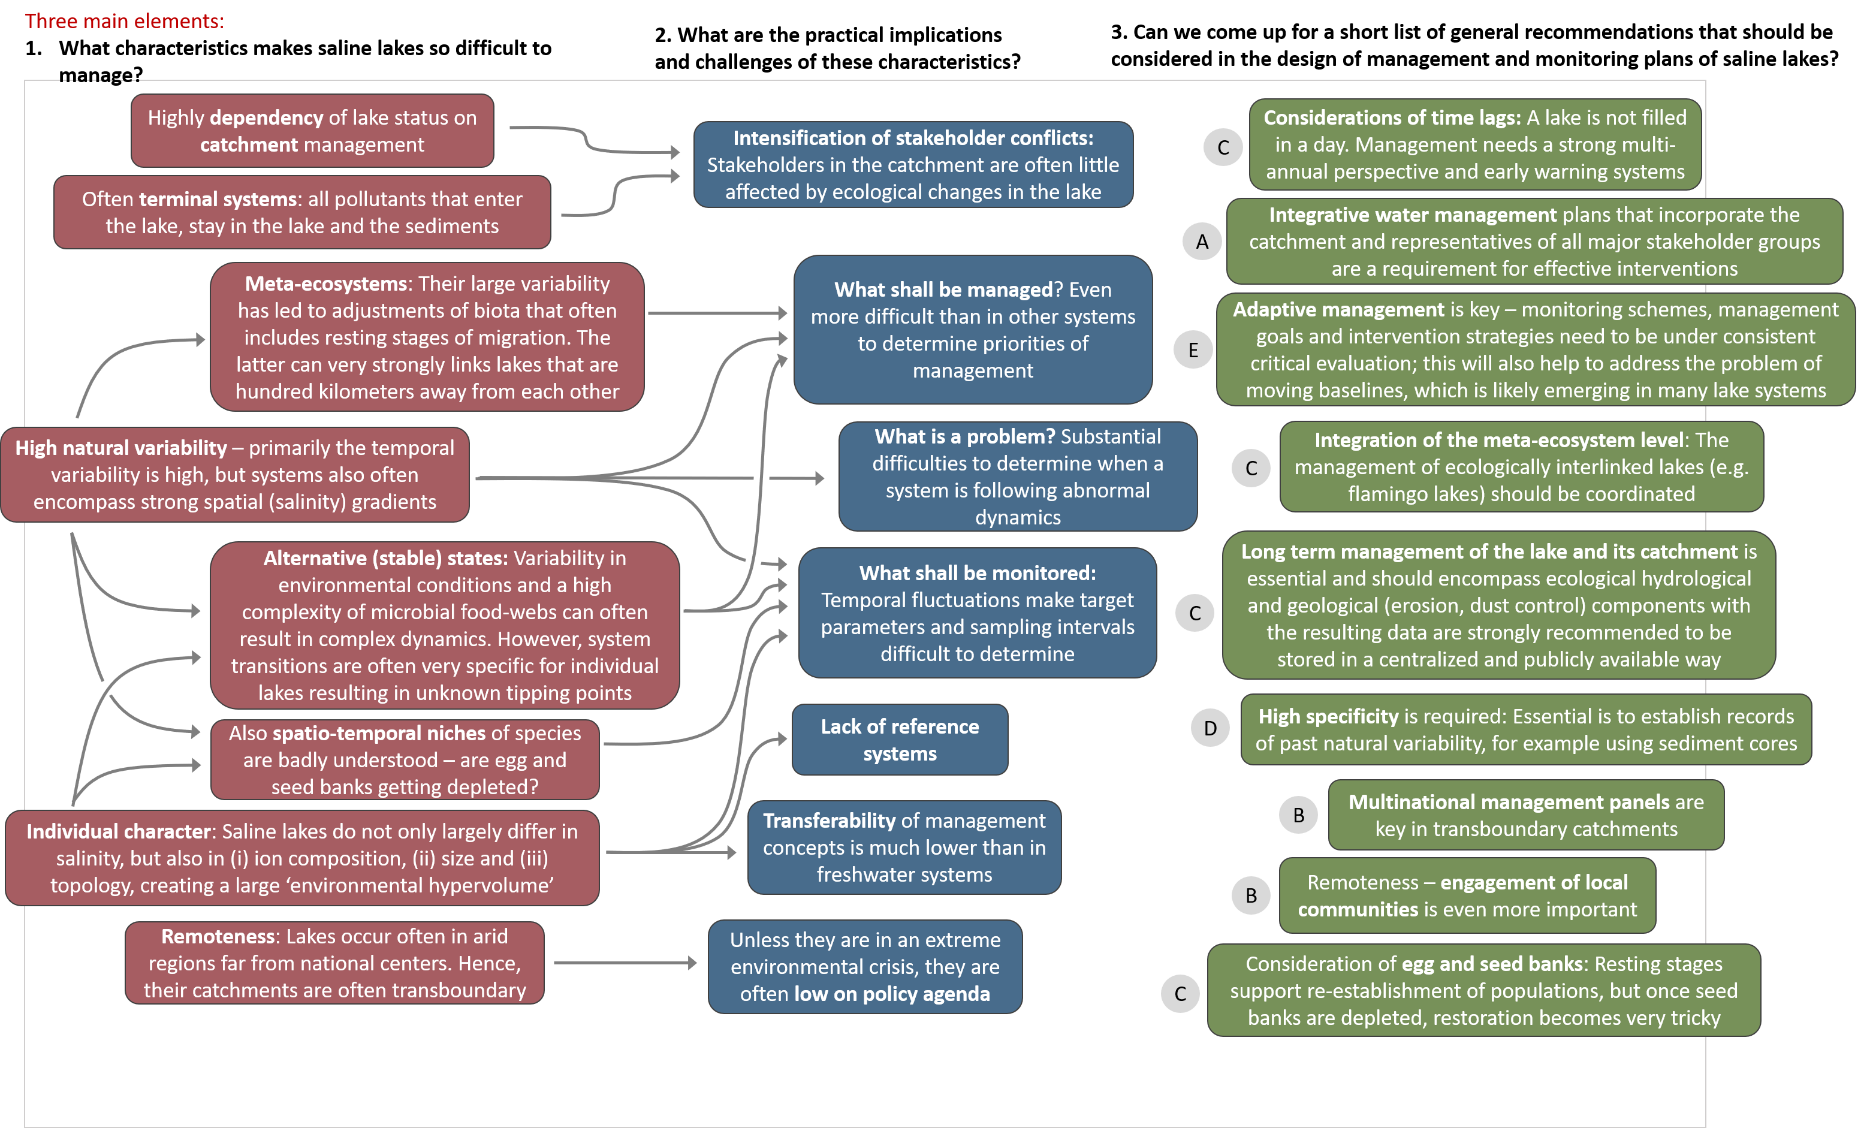


Fig. S4.1: Synthesis of the repeated expert group discussions on the three key questions (answers colour red, blue and green, respectively) identified in the online plenum discussion. The answers to question 1 and 2 have been integrated into Fig. 5 in the main text. Answers to question 3 have been grouped into five core recommendations (Letters A-E). These five recommendations were (A) Integrated water management plans, (B) Stakeholder engagement, (C) Long term planning for meta-ecosystems, (D) Accounting for high specificity and (E) Adaptive management and restoration.

**S5: References**

Alcorlo, P., Baltanás, A. and Montes, C., 1996. Is it possible to predict the salinity of Iberian salt lakes from their conductivity?. *Hydrobiologia*, *330*, pp.137-142.

Ballesteros Navarro, B.J., Camuñas Palencia, C., Mejías Moreno, M., Camacho González, A., Sánchez Ramos, D., Albacete Carreño, L. and Rochera Cordellat, C., 2018. *Lagunas mesetarias de La Mancha: Funcionamiento hidrológico, cultura y medio ambiente*. CSIC-Instituto Geológico y Minero de España (IGME).

Chemikalien, A.O., Verordnung des Bundesministers für Land-und Forstwirtschaft. *Umwelt und Wasserwirtschaft über die Begrenzung von Abwasseremissionen aus der Herstellung von organischen Chemikalien*.

Camacho, A. and de Wit, R., 2003. Effect of nitrogen and phosphorus additions on a benthic microbial mat from a hypersaline lake. *Aquatic microbial ecology*, *32*(3), pp.261-273.

Camacho, A., Miracle, M.R. and Vicente, E., 2003. Which factors determine the abundance and distribution of picocyanobacteria in inland waters? A comparison among different types of lakes and ponds. *Archiv Fur Hydrobiologie*, *157*(3), pp.321-338.

Medina Domingo, L., 2002. Plantas acuáticas de las lagunas y humedales de Castilla-La Mancha.

Comin, F.A. and Alonso, M., 1988. Spanish salt lakes: their chemistry and biota. *Hydrobiologia*, *158*, pp.237-245.

Corrales-González, M., Rochera, C., Picazo, A. and Camacho, A., 2019. Effect of wastewater management on phosphorus content and sedimentary fractionation in Mediterranean saline lakes. *Science of the total environment*, *668*, pp.350-361.

Cotera, R.V., Guillaumot, L., Sahu, R.K., Nam, C., Lierhammer, L. and Costa, M.M., 2023. An assessment of water management measures for climate change adaptation of agriculture in Seewinkel. *Science of the Total Environment*, *885*, p.163906.

De la Peña, J. A., 1987. Las lagunas de La Mancha: un ejemplo de sales en ambiente continental. In RACEFN (ed.), Bases Científicas Para la Protección de los Humedales en España. Real Academia de Ciencias, Madrid, Spain.

Doña, C., Morant, D., Picazo, A., Rochera, C., Sánchez, J.M. and Camacho, A., 2021. Estimation of water coverage in permanent and temporary shallow lakes and wetlands by combining remote sensing techniques and genetic programming: application to the mediterranean basin of the Iberian Peninsula. *Remote Sensing*, *13*(4), p.652.

Doña, C., Chang, N.B., Caselles, V., Sánchez, J.M., Pérez-Planells, L., Bisquert, M.D.M., García-Santos, V., Imen, S. and Camacho, A., 2016. Monitoring hydrological patterns of temporary lakes using remote sensing and machine learning models: Case study of la Mancha Húmeda Biosphere Reserve in central Spain. *Remote Sensing*, *8*(8), p.618.

European Union (2000). Water Framework Directive (WFD) 2000/60/EC: Directive 2000/60/EC of the European Parliament and of the Council of 23 October 2000 establishing a framework for Community action in the field of water policy. Official Journal of the European Communities, L 327 (1): 1-72

García-Ferrer, I., Camacho, A., Armengol, X., Miracle, M.R. and Vicente, E., 2003. Seasonal and spatial heterogeneity in the water chemistry of two sewage-affected saline shallow lakes from central Spain. *Hydrobiologia*, *506*, pp.101-110.

Guerrero, M.C. and De Wit, R., 1992. Microbial mats in the inland saline lakes of Spain. *Limnetica*, *8*, pp.197-204.

Hackl, P. and Ledolter, J., 2023. A Statistical Analysis of the Water Levels at Lake Neusiedl. *Austrian Journal of Statistics*, *52*(1), pp.87-100.

Hammer, U.T., 1986. *Saline lake ecosystems of the world* (Vol. 59). Springer Science & Business Media.

Margalef, R., 1947. Estudios sobre la vida en las aguas continentals de la región manchega. Publicaciones Instituto de Biologia Aplicada 4: 5–51.

Martino, P., 1988. Limnología de las lagunas salinas españolas. PhD dissertation, Universidad Autónoma de Madrid, Madrid, Spain 264 pp.

Delgado, S.O., del Cura, M.Á.G., Martín, F.M. and de Azcona Fraile, M.C.L., 1987. Mineralogénesis de sales sulfatadas-cloruradas magnésicas en la Laguna de Alcahozo (La Mancha-Ciudad Real). *Boletín de la Sociedad Española de Mineralogía*, *10*(2), pp.219-229.

Soja, G., Züger, J., Knoflacher, M., Kinner, P. and Soja, A.M., 2013. Climate impacts on water balance of a shallow steppe lake in Eastern Austria (Lake Neusiedl). *Journal of Hydrology*, *480*, pp.115-124.

Tolotti, M., Guella, G., Herzig, A., Rodeghiero, M., Rose, N.L., Soja, G., Zechmeister, T., Yang, H. and Teubner, K., 2021. Assessing the ecological vulnerability of the shallow steppe Lake Neusiedl (Austria-Hungary) to climate-driven hydrological changes using a palaeolimnological approach. *Journal of Great Lakes Research*, *47*(5), pp.1327-1344.

Wurtsbaugh, W.A., Miller, C., Null, S.E., DeRose, R.J., Wilcock, P., Hahnenberger, M., Howe, F. and Moore, J., 2017. Decline of the world's saline lakes. *Nature Geoscience*, *10*(11), pp.816-821.
